1 Analyses of vaccine-specific circulating and bone marrow-  
2 resident B cell populations reveal benefit of delayed vaccine  
3 booster dosing with blood-stage malaria antigens

4

5 JR Barrett<sup>1</sup>, SE Silk<sup>1</sup>, CG Mkindi<sup>2</sup>, KM Kwiatkowska<sup>1</sup>, MM Hou<sup>1</sup>, AM Lias<sup>1</sup>, WF Kalinga<sup>2</sup>, IM  
6 Mtaka<sup>2</sup>, K McHugh<sup>1</sup>, M Bardelli<sup>1</sup>, H Davies<sup>1</sup>, LDW King<sup>1</sup>, NJ Edwards<sup>1</sup>, VS Chauhan<sup>3</sup>, P  
7 Mukherji<sup>4</sup>, S Rwezaula<sup>5</sup>, CE Chitnis<sup>6</sup>, AI Olotu<sup>2</sup>, AM Minassian<sup>1</sup>, SJ Draper<sup>1</sup>, CM Nielsen<sup>1</sup>.

8

9 <sup>1</sup> University of Oxford, Oxford, UK.

10 <sup>2</sup> Ifakara Health Institute, Bagamoyo, Tanzania.

11 <sup>3</sup> International Centre for Genetic Engineering and Biotechnology (ICGEB), New Delhi, India.

12 <sup>4</sup> Multi Vaccines Development Program (MVDP), New Delhi, India.

13 <sup>5</sup> Muhimbili National Hospital, Dar es Salaam, Tanzania.

14 <sup>6</sup> Unité de Biologie de Plasmodium et Vaccins, Institut Pasteur, Université Paris Cité, Paris,  
15 France.

16

17 Correspondence to: [carolyn.nielsen@bioch.ox.ac.uk](mailto:carolyn.nielsen@bioch.ox.ac.uk)

## 18 Abstract

19 We have previously reported primary endpoints of a clinical trial testing two vaccine  
20 platforms for delivery of *Plasmodium vivax* malaria DBPRII: viral vectors (ChAd63, MVA) and  
21 protein/adjuvant (PvDBPII with 50µg Matrix-M™ adjuvant). Delayed boosting was  
22 necessitated due to trial halts during the pandemic and provides an opportunity to  
23 investigate the impact of dosing regimens. Here, using flow cytometry – including agnostic  
24 definition of B cell populations with the clustering tool CITRUS – we report enhanced  
25 induction of DBPRII-specific plasma cell and memory B cell responses in protein/adjuvant  
26 versus viral vector vaccinees. Within protein/adjuvant groups, delayed boosting further  
27 improved B cell immunogenicity as compared to a monthly boosting regimen. Consistent  
28 with this, delayed boosting also drove more durable anti-DBPRII serum IgG. In an  
29 independent vaccine clinical trial with the *P. falciparum* malaria RH5.1 protein/adjuvant  
30 (50µg Matrix-M™) vaccine candidate, we similarly observed enhanced circulating B cell  
31 responses in vaccinees receiving a delayed final booster. Notably, a higher frequency of  
32 vaccine-specific (putatively long-lived) plasma cells were detected in the bone marrow of  
33 these delayed boosting vaccinees by ELISPOT and correlated strongly with serum IgG.

34

35 Finally, following controlled human malaria infection with *P. vivax* parasites in the DBPRII  
36 trial, *in vivo* growth inhibition was observed to correlate with DBPRII-specific B cell and  
37 serum IgG responses. In contrast, the CD4+ and CD8+ T cell responses were impacted by  
38 vaccine platform but not dosing regimen, and did not correlate with *in vivo* growth inhibition  
39 in a challenge model. Taken together, our DBPRII and RH5 data suggest an opportunity for  
40 dosing regimen optimisation in the context of rational vaccine development against  
41 pathogens where protection is antibody-mediated.

## 42 Introduction

43 The roll-out of various SARS-CoV-2 vaccines during the COVID-19 pandemic highlighted the  
44 importance of understanding the immunological significance of booster dosing timing in  
45 order to maximise protective efficacy. Increased peak serum antibody concentrations were  
46 observed with delayed booster regimens in both viral vector [1; 2] and mRNA [3] delivery  
47 platforms, indicating potential opportunities to maximise humoral immunity through  
48 optimisation of antigen delivery timing. The impact of delayed booster regimens has also  
49 been explored in more depth by earlier work from the *Plasmodium falciparum* malaria field  
50 with both the blood-stage malaria vaccine candidate RH5 [4; 5] and the pre-erythrocytic  
51 vaccine candidate RTS,S (now WHO-approved as Mosquirix; [6; 7; 8; 9; 10]). Notably, the  
52 impact of delayed booster dosing on vaccine-specific serum IgG durability has been  
53 published less widely; the RH5 trials remain the only example of improvements in durability  
54 through modifications in booster dosing regimens [4; 5]. We have previously speculated on  
55 the underlying biological mechanisms and reasons for discrepancies between the RTS,S  
56 and RH5 trials [5], and these questions clearly require further investigation. Furthermore, it is  
57 critical to confirm whether the delayed booster phenomenon is a broader immunological  
58 principle, or an anomaly restricted to the RH5.1/AS01 vaccine candidate.

59

60 Here, we present analyses of B cell, T cell and serum antibody responses to a blood-stage  
61 malaria antigen from a different species of malaria – DBPR11, *Plasmodium vivax* – and  
62 investigate the impact of delayed boosters in the context of heterologous viral vector or  
63 protein/adjuvant vaccine platforms (**Table 1**). This work builds on the initial clinical trial  
64 publication, which focused on the efficacy results of the controlled human malaria infection  
65 (CHMI) [11]. Supporting these findings, we additionally present peripheral B cell analyses  
66 (using the same B cell flow cytometry panel) from a *P. falciparum* RH5.1/Matrix-M™ vaccine  
67 trial where PBMC samples were available for exploratory analyses. For the first time in the

68 context of malaria vaccinology, we also report on vaccine-specific bone marrow plasma  
69 cells.

70

71 Taken together, our data support delayed booster vaccination in the next phase of *P. vivax*  
72 DBPRII and *P. falciparum* RH5 vaccine development and, more broadly, support  
73 consideration of alternative dosing regimens for vaccines against a range of pathogens  
74 where protection is antibody-mediated.

75

76 **Table 1. Vaccination regimens in DBPRII and RH5 clinical trials.** Post-vaccination  
77 samples analysed in this study are following the final vaccination (FV), indicated by the  
78 highlighted cell. See Methods for further details of clinical trial design.

| Target                      | Platform                                                | Dosing regimen                  | Timing of vaccinations<br>(m = month) |        |        |        | n <sup>§</sup> |
|-----------------------------|---------------------------------------------------------|---------------------------------|---------------------------------------|--------|--------|--------|----------------|
|                             |                                                         |                                 | Dose 1                                | Dose 2 | Dose 3 | Dose 4 |                |
| <i>P. vivax</i><br>DBPRII   | ChAd63-<br>DBPRII<br>and<br>MVA-DBPRII<br>viral vectors | Monthly<br>[VV-M]               | 0m                                    | 2m     | -      |        | 6              |
|                             |                                                         | Delayed<br>[VV-D]               | 0m                                    | 17m    | 19m    |        | 2              |
|                             | PvDBPII<br>protein/<br>Matrix-M™                        | Monthly<br>[PA-M]               | 0m                                    | 1m     | 2m     |        | 4              |
|                             |                                                         | Delayed<br>[PA-D]               | 0m                                    | 1m     | 14m    |        | 8              |
|                             |                                                         | Delayed<br>+ booster<br>[PA-DB] | 0m                                    | 1m     | 14m    | 19m    | 5              |
|                             |                                                         | (Same vaccinees as PA-D)        |                                       |        |        |        |                |
| <i>P. falciparum</i><br>RH5 | RH5.1<br>protein/<br>Matrix-M™                          | Monthly<br>[M]                  | 0m                                    | 1m     | 2m     |        | 5              |
|                             |                                                         | Delayed<br>[D]                  | 0m                                    | 1m     | 6m*    |        | 6              |

79 <sup>§</sup> Reflects sample size of groups completing full vaccination regimen in clinical trials [11]. All  
80 trial participants were healthy adults. Sample sizes for individual assays are specified in  
81 figure legends.

82 \* Final dose of antigen (but not adjuvant) in the delayed arm of *P. falciparum* RH5 trial was  
83 also fractionated (see Methods).

## 84 Results

85 Delayed booster dosing increases induction of circulating DBPRII- and RH5-specific  
86 plasma cells and memory B cells.

87 Using fluorophore-conjugated DBPRII protein probes to detect DBPRII-specific cells, we  
88 evaluated the capacity of the viral vector and protein/adjuvant platforms to drive a range of B  
89 cell responses (gating strategy shown in **Supplemental Figure 1A**). Within the plasma cell  
90 population (CD19+CD27+CD38+; **Figure 1A**) – which peaked 7-days after final vaccination  
91 – significantly higher frequencies of DBPRII-specific cells were observed in protein/adjuvant  
92 as compared to heterologous viral vector vaccinees at FV+7 and FV+14. Within the memory  
93 IgG+ B cell population (CD19+CD27+IgG+ [excluding plasma cells]; **Figure 1B**), frequencies  
94 of DBPRII-specific cells were significantly higher in protein/adjuvant vaccinees at all post-  
95 vaccination time points. Consistent with expected differences in kinetics of short-lived  
96 plasma cell (SLPC) and memory B cell responses, DBPRII-specific plasma cells peaked  
97 earlier at FV+7 and then declined by FV+28, whilst frequencies of DBPRII-specific memory  
98 IgG+ B cells were better maintained in peripheral blood between FV+7 and FV+28 (with a  
99 trend towards a peak at FV+14 [5]).

100

101 We next compared DBPRII-responses between the dosing regimens of the protein/adjuvant  
102 platform. Here, we observed more robust plasma cell (**Figure 1C**) and memory IgG+ B cell  
103 (**Figure 1D**) responses following delayed booster dosing (PA-D) as compared to monthly  
104 booster dosing (PA-M). Proliferation – as indicated by intracellular Ki67 staining – was higher  
105 in plasma cells than memory B cells across all groups and time points (**Supplemental**  
106 **Figure 1B-C**). Differences between platforms and dosing regimens remained when we  
107 stratified between activated (CD21-CD27+) and resting (CD21+CD27+) memory IgG+ B cell  
108 populations (**Supplemental Figure 2A-D**). Interestingly, Ki67 expression was significantly  
109 higher in activated memory IgG+ B cells in PA-D at FV+7 as compared to PA-M or PA-DB,  
110 and at FV+14 as compared to PA-M (**Supplemental Figure 1C-D**). Very low memory IgA+ B

111 cell responses were detectable (higher in protein/adjuvant than viral vector vaccinees), while  
112 responses within the IgM+ memory compartment were negligible (**Supplemental Figure 2E-**  
113 **H**).

114

115 We sought to validate these delayed booster dosing-mediated differences with samples from  
116 an independent clinical trial with a different cohort (Tanzanian adults) and antigen (RH5).  
117 Here, we observed comparable plasma cell and memory IgG+ B cell kinetics and differences  
118 in proliferation (**Figure 1E-F; Supplemental Figure 3**). Frequencies of RH5-specific cells  
119 within both populations were again higher in delayed booster dosing vaccinees but only  
120 reached statistical significance (by Mann Whitney test) for RH5-specific memory B cells at  
121 FV+14, likely related to greater intra-group variation as compared to the DBPRII vaccinees.  
122 Trends were comparable, but not significant, when activated and resting memory IgG+ B  
123 cells were analysed separately (**Supplemental Figure 4**). To note, while background with  
124 the RH5 probes was more variable than observed with the DBPRII probes here, or in  
125 previous studies with the RH5 probe protocol [5; 12], standardisation of RH5 probe gating  
126 between all samples and parent populations retains confidence in the data interpretation. No  
127 significant post-vaccination responses were observed for RH5-specific memory IgA+ or IgM+  
128 populations (**Supplemental Figure 4**).

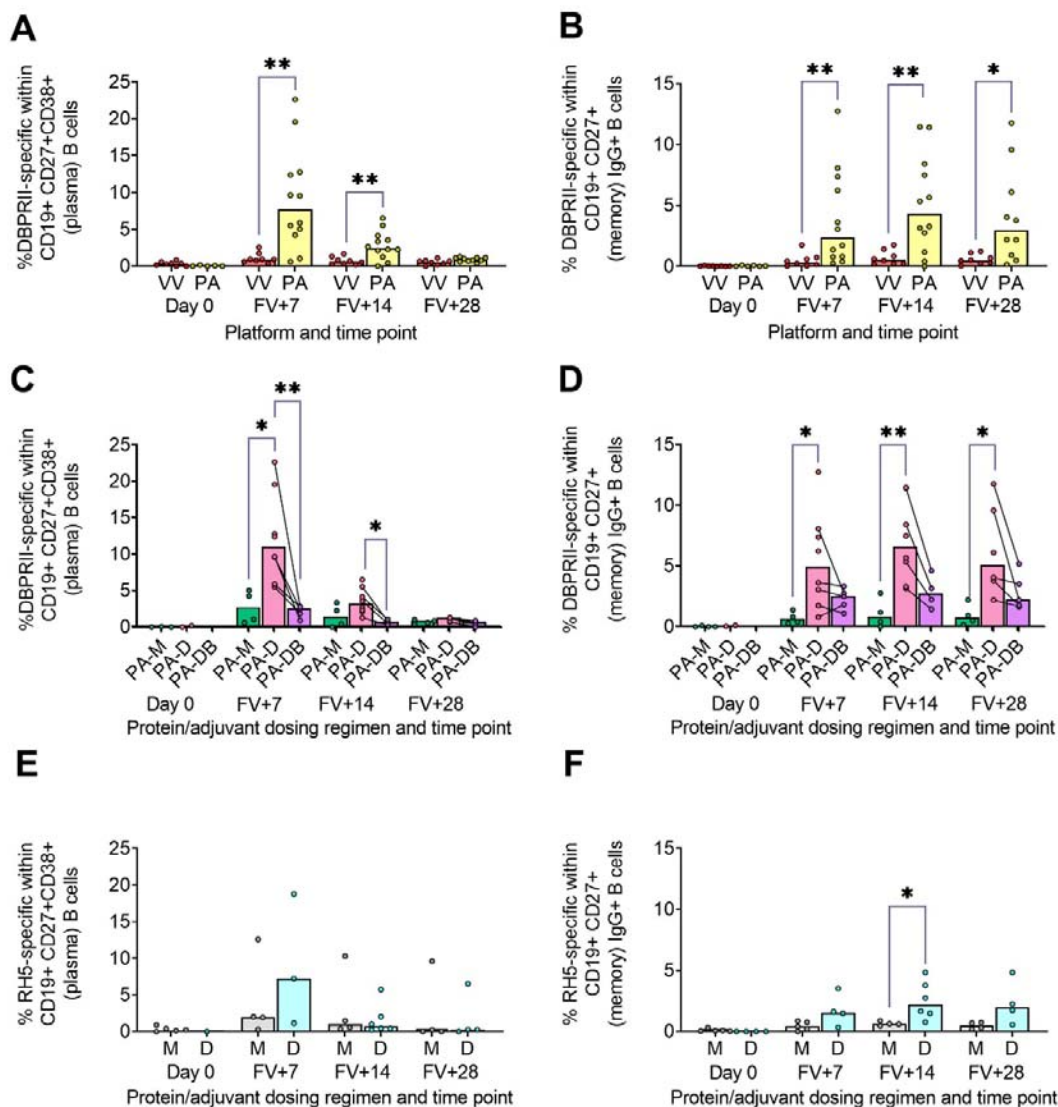

129

130 Figure 1. Vaccinate-specific plasma cell and memory IgG+ B cell responses.

131 PBMC from pre-vaccination (Day 0) and post-final vaccination (FV) time points were analysed for B cell  
 132 responses by flow cytometry; gating strategies are as described in Methods and **Supplemental Figures 1 and 3**.  
 133 Frequencies of DBPRII-specific B cells – identified by probe staining – were compared between vaccine  
 134 platforms (A-B) or protein/adjuvant dosing regimens (C-D) within both plasma cell (A, C) or memory IgG+ B cell  
 135 (B, D) populations. Similarly, frequencies of RH5-specific B cells were compared between protein/adjuvant  
 136 dosing regimens within plasma cell (E) and memory IgG+ B cells (F). IgM+, IgA+, activated and resting memory  
 137 B cell responses are shown in **Supplemental Figures 2 and 4**. VV = ChAd63-MVA viral vectors; PA = PvDBP  
 138 protein/adjuvant [PA-M and PA-D]; PA-M = PvDBP protein/adjuvant monthly dosing; PA-D = PvDBP  
 139 protein/adjuvant delayed booster dosing; PA-DB = PvDBP protein/adjuvant delayed booster dosing with extra  
 140 booster; M = RH5.1/adjuvant monthly dosing; D = RH5.1/adjuvant delayed booster dosing. Post-vaccination  
 141 comparisons were performed between DBPRII platforms (A-B) or RH5 dosing regimens (E-F) with Mann-Whitney  
 142 U tests, or between PvDBP protein/adjuvant dosing regimens by Kruskal Wallis test with Dunn's correction for  
 143 multiple comparisons (C-D). Sample sizes for all assays were based on sample availability; each circle  
 144 represents a single sample. (A-B) VV/PA: Day 0 = 8/5-6, FV+7 = 8/12, FV+14 = 8/12, FV+28 = 8/10. (C-D) PA-  
 145 M/PA-D/PA-DB: Day 0 = 3-4/2/na, FV+7 = 4/8/5, FV+14 = 4/8/4, FV+28 = 4/6/5. (E-F) M/D: Day 0 = 5/1-4, FV+7  
 146 = 4-5/3-4, FV+14 = 4/6, FV+28 = 4/4. PA-D vaccinees returning in the PA-DB group are connected by lines. Bars  
 147 represent medians. \*  $p < 0.05$ , \*\*  $p < 0.01$ .

148 Agnostically-defined B cell subsets reveal further differences in DBPRII- and RH5-  
 149 specific B cell responses between vaccine platforms and dosing regimens

150 To supplement the more traditional approach above, clustering was next performed with  
 151 CITRUS to agnostically define B cell populations for further analysis within both the DBPRII  
 152 and RH5 datasets. For the DBPRII trial samples, 33 clusters were identified in CITRUS  
 153 within live single (B cell-enriched) lymphocytes. Several sets of clusters had very similar  
 154 marker expression patterns, resulting in consolidation for FlowJo gating strategies (see  
 155 Methods). This gave a total of 7 agnostically-defined populations to reanalyse for DBPRII-  
 156 specific responses (**Table 2**). Likewise, 36 clusters were identified in the RH5 trial samples,  
 157 consolidating to 10 new populations for reanalysis of RH5-specific responses (**Table 2**).  
 158 Populations where significant differences in antigen-specific responses were detected post-  
 159 vaccination or between dosing regimens are shown in **Figure 2** (gating shown in  
 160 **Supplemental Figure 5**). DBPRII “Population 2” and RH5 “Population 8” were equivalent,  
 161 while all other populations identified were unique to the separate trials.

162

163 **Table 2. Main peripheral B cell populations as agnostically defined using CITRUS.** NB  
 164 population ordering and numbers are arbitrary.

| Trial  | Population      | FlowJo gating strategy |      |      |      |       |      |         |
|--------|-----------------|------------------------|------|------|------|-------|------|---------|
|        |                 | CD19                   | CD20 | CD21 | CD27 | CD138 | CD38 | Isotype |
| DBPRII | 1*              | +                      | +    | +    | +    | -     | -    | IgG     |
|        | 2* <sup>%</sup> | -                      | -    | -    | -    | -     | +    | IgG     |
|        | 3               | +                      | +    | +    | -    | -     | -    | IgM     |
|        | 4               | -                      | -    | -    | -    | -     | -    | IgG     |
|        | 5               | +                      | +    | +    | +    | -     | -    | IgA     |
|        | 6               | +                      | +    | +    | -    | +     | -    | IgM     |
|        | 7               | +                      | +    | +    | +    | -     | -    | IgM     |
| RH5    | 8 <sup>%</sup>  | -                      | -    | -    | -    | -     | +    | IgG     |
|        | 9               | -                      | -    | -    | +    | -     | +    | IgG     |
|        | 10              | +                      | +    | +    | -    | -     | +    | IgM     |
|        | 11              | +                      | +    | +    | +    | -     | +    | IgM     |
|        | 12*             | +                      | +    | +    | +    | -     | +    | IgG     |
|        | 13              | +                      | +    | +    | +    | -     | +    | IgA     |
|        | 14              | +                      | +    | +    | -    | +     | +    | IgM     |
|        | 15              | -                      | -    | -    | -    | -     | -    | -       |
|        | 16              | +                      | +    | +    | -    | -     | +    | IgA     |
|        | 17              | +                      | +    | +    | -    | -     | +    | -       |

165 \* Significant antigen-specific responses detected within groups; shown in **Figure 2**; gating strategies shown in  
 166 **Supplemental Figure 5**. <sup>%</sup> Equivalent populations identified independently.



167

168 In the DBPRII trial clusters, significant differences were observed between monthly and  
169 delayed dosing in “Population 1” (CD19+CD20+CD21+CD27+CD138-CD38-IgM-IgA-IgG+;  
170 **Figure 2B; Supplemental Figure 5**) and trends between monthly and delayed or  
171 delayed/booster (PA-DB) dosing in “Population 2” (CD19-CD20-CD21-CD27-CD138-  
172 CD38+IgM-IgA-IgG+; **Figure 2C; Supplemental Figure 5**). While “Population 1” is similar to  
173 the CD19+CD21+CD27+IgG+ resting memory population analysed above (**Supplemental**  
174 **Figure 2**), Population 2 was not included in the previous analysis. Responses within other  
175 clusters and frequencies of each cluster within total live (B cell-enriched) lymphocytes are  
176 shown in **Supplemental Figure 6**.

177

178 In the new RH5 trial populations, significant responses were observed in Population 12  
179 (**Figure 2E; Supplemental Figure 5**; CD19+CD20+CD21+CD27+CD138-CD38+IgM-IgA-  
180 IgG+; again, a similar population to CD19+CD27+IgG+ in **Figure 1F**) in both monthly and  
181 delayed booster dosing, with higher responses in delayed boosting vaccinees. Significant  
182 differences in post-vaccination RH5-specific responses were not detected between groups in  
183 the remaining populations (**Supplemental Figure 7**). No significant responses were  
184 observed within Population 8 (CD19-CD20-CD21-CD27-CD138-CD38+IgM-IgA-IgG+;  
185 equivalent Population 2 in the DBPRII trial) in the delayed boosting vaccinees.

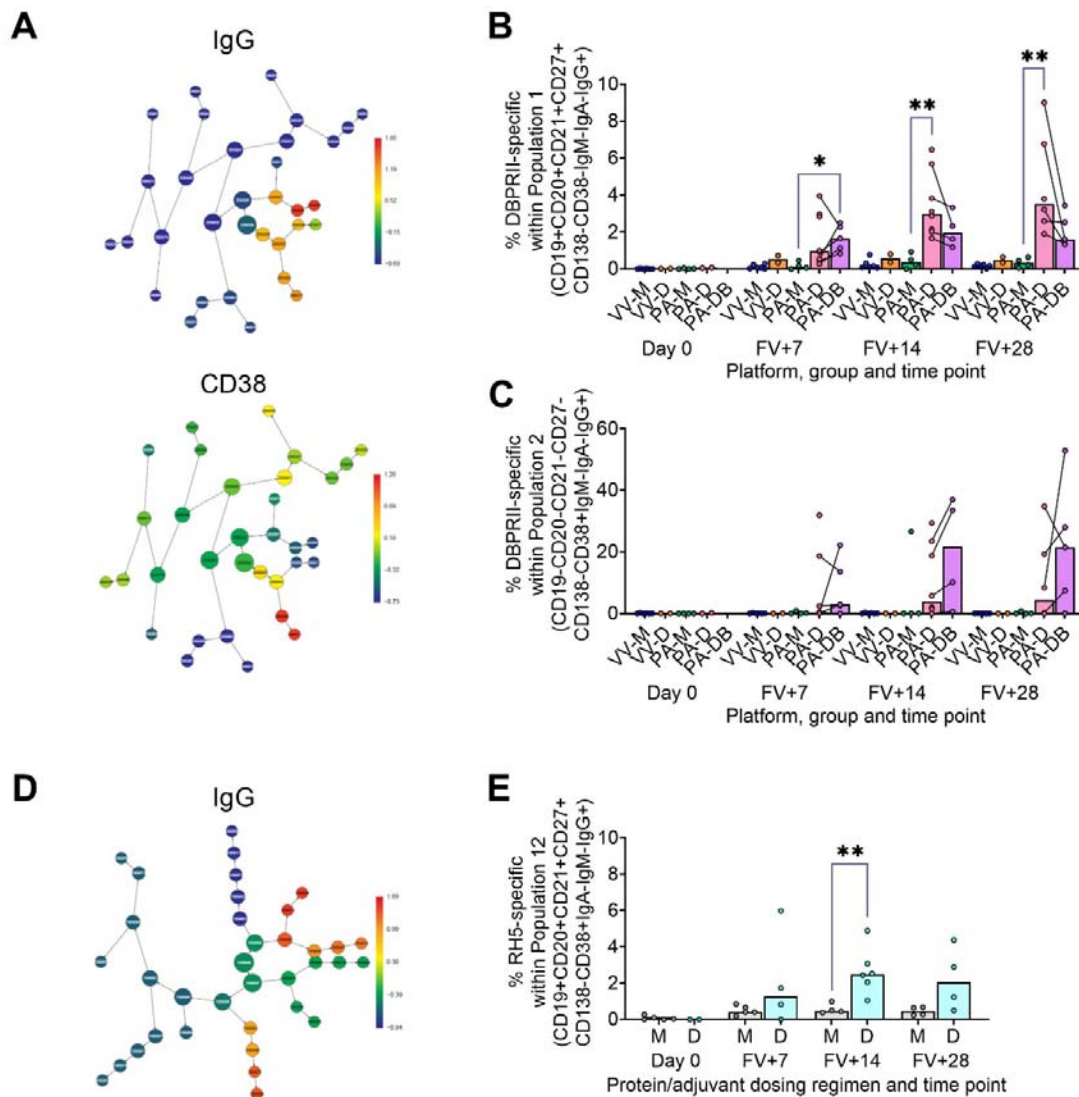

186

187 Figure 2. Vaccine-specific responses within agnostically-defined B cell populations using CITRUS.  
 188 CITRUS was run on single live (B cell-enriched) lymphocyte flow cytometry fcs files to agnostically define the  
 189 main B cell populations within either DBPR11 (A-C) or RH5 (D-E) trial samples. Clusters identified by CITRUS are  
 190 visualised in dendrograms (A, D), colour-coded for example markers of interest (A- IgG, CD38; D- IgG). Each  
 191 node represents a cluster. Median marker expression within each cluster was used to define gating strategies for  
 192 B cell populations in FlowJo, which were re-analysed for DBPR11- (B-C) or RH5-specific (E) responses through  
 193 probe staining (gating shown in Supplemental Figure 5). See Table 2 and Supplemental Figures 6-7 for a full  
 194 list of populations identified via CITRUS clusters for further analysis. VV-M = ChAd63-MVA viral vector monthly  
 195 dosing; VV-D ChAd63-MVA delayed booster dosing; PA-M = PvDBP11 protein/adjuvant monthly dosing; PA-D =  
 196 PvDBP11 protein/adjuvant delayed booster dosing; PA-DB = PvDBP11 protein/adjuvant delayed booster dosing  
 197 with extra booster; M = RH5.1/adjuvant monthly dosing; D = RH5.1/adjuvant delayed booster dosing. FV = final  
 198 vaccination. Post-vaccination comparisons were performed between PvDBP11 protein/adjuvant dosing regimens  
 199 by Kruskal Wallis test with Dunn's correction for multiple comparisons (B-C) or RH5 dosing regimens (E) with  
 200 Mann-Whitney U tests. Sample sizes for all assays were based on sample availability; each circle represents a  
 201 single sample. (B-C) VV-M/VV-D/PA-M/PA-D/PA-DB: Day 0 = 6/2/4/2/na, FV+7 = 6/2/4/8/5, FV+14 = 6/2/4/8/4,  
 202 FV+28 = 6/2/4/6/5. (E) M/D: Day 0 = 5/2, FV+7 = 5/4, FV+14 = 4/6, FV+28 = 4/4. PA-D vaccinees returning in the  
 203 PA-DB group are connected by lines. Bars represent medians. \*  $p < 0.05$ , \*\*  $p < 0.01$ .

204 DBPRII-specific serum antibody declines more slowly in delayed booster dosing  
205 vaccinees.

206 We have previously published ELISA data on serum anti-DBPRII total IgG (against the Sal I  
207 strain), with an emphasis on comparison of FV+14 responses. Here we observed  
208 significantly higher titres with the delayed protein/adjuvant dosing regimen as compared to  
209 viral vectors [11]. Now, we extend these analyses to compare the impact of platform and  
210 regimen on different isotypes/ subclasses, (**Figure 3A-F; Supplemental Figure 8**), durability  
211 of serum antibody (**Figure 3G-H**), and immunodominance of subdomain 3 (sd3;  
212 **Supplemental Figure 8**). The isotype and subclass analyses showed IgG1, IgG3, IgA and  
213 IgA1 responses in both platforms, while IgG4 was detectable solely in the protein/adjuvant  
214 vaccinees. No statistically significant post-vaccination IgM responses were observed within  
215 individual groups (**Supplemental Figure 8**), while no detectable IgG2 or IgA2 was observed  
216 in any sample (not shown). The protein/adjuvant platform also induced higher IgG1, IgG3,  
217 IgA and IgA1 (and IgG4) responses as compared to viral vectors (**Supplemental Figure 8A-**  
218 **F**). Within the protein/adjuvant platform, the DBPRII-specific IgG1, IgG4 and IgA1 response  
219 was significantly higher in delayed dosing vaccinees (**Figure 3A, C, E**), but comparable  
220 between regimens for IgG3 and IgA (**Figure 3B, D**). Median IgM responses were higher in  
221 monthly dosing but not statistically significant (**Figure 3F**). Interestingly, we also observed  
222 increased anti-DBPRII serum total IgG durability in delayed dosing regimens with both  
223 vaccine platforms; a significantly higher fold-change in total serum IgG was observed > 3-  
224 months following the peak response in delayed booster vaccinees (VV-D, PA-D; median =  
225 0.45) as compared to monthly dosing vaccinees (VV-M, PA-M; median = 0.15; **Figure 3G**).  
226 Enhanced serum durability was also observed with IgG1 in the isotype and subclass  
227 analyses (**Figure 3H**). Finally, delayed dosing with PvDBPRII appears to have no impact on  
228 the immunodominance of the sd3 region (**Supplemental Figure 8**). Equivalent serological  
229 analyses from the RH5.1/Matrix-M<sup>TM</sup> trial will be the focus of a separate report (Silk et al,  
230 *manuscript in preparation*).

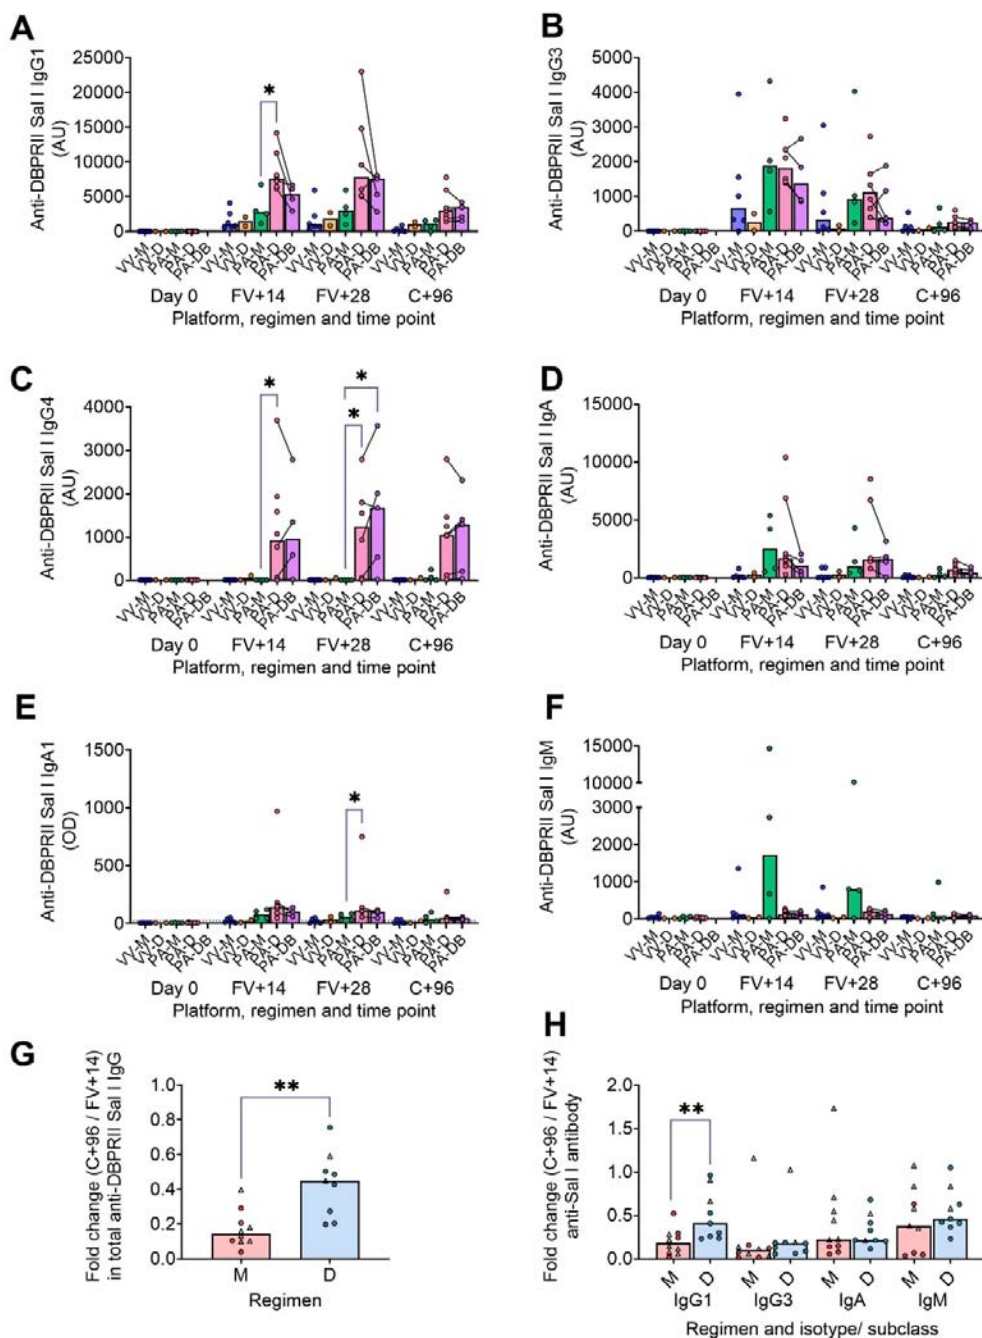

231  
232  
233  
234  
235  
236  
237  
238  
239  
240  
241  
242  
243  
244  
245  
246  
247

Figure 3. DBPRII-specific peak antibody responses and serum maintenance.

Standardised ELISAs were developed to report anti-DBPRII specific antibody responses against the Sal I strain in pre-vaccination (Day 0) and post-final vaccination (FV) serum samples. Responses were compared between protein/adjuvant dosing regimens for IgG1 (A), IgG3 (B), IgG4 (C), IgA (D), IgA1 (E), and IgM (F). Fold change between C+96 and FV+14 was calculated for total IgG (G) and specific isotypes/subclasses (H) to compare monthly (M: VV-M, PA-M) and delayed (D: VV-D, PA-D) booster regimens. IgG4 and IgA were excluded from this analysis as  $\geq 1$  vaccinee had undetectable antibody at both time points. Comparisons between vaccine platforms are shown in **Supplemental Figure 8**. VV-M = ChAd63-MVA viral vector monthly dosing; VV-D = ChAd63-MVA delayed booster dosing; PA-M = protein/adjuvant monthly dosing; PA-D = protein/adjuvant delayed booster dosing; PA-DB = protein/adjuvant delayed booster dosing with extra booster. C+96 = 96 days after controlled human malaria infection (approximately 16-weeks after FV). Post-vaccination comparisons were performed between protein/adjuvant dosing regimens by Kruskal Wallis test with Dunn's correction for multiple comparisons (A-F) or fold changes with Mann-Whitney U tests (G-H). Sample sizes for all assays were based on sample availability; each circle represents a single sample [triangles indicate viral vector samples in G-H]. (A-F) VV-M/VV-D/PA-M/PA-D/PA-DB: Day 0 = 6/2/4/8/na, FV+14 = 6/2/4/8/4, FV+28 = 6/2/4/6/5. (G-H) M = 9-10, D = 9. Bars represent medians. \*  $p < 0.05$ , \*\*  $p < 0.01$ .

## 248 Delayed booster dosing does not impact DBPRII-specific T cell responses

249 In our main trial report, we showed higher frequencies of IFN- $\gamma$ -producing effector memory  
250 (CD45RA-CCR7-) CD4+ T cells at FV+14 in viral vector as compared to protein/adjuvant  
251 vaccinees, with no significant differences observed between monthly and delayed dosing  
252 regimens with the latter platform [11]. Here, we extended these analyses to include further  
253 time points as well as IL-2/ TNF- $\alpha$ / IL-5/ IL-13 intracellular cytokine detection (in addition to  
254 IFN- $\gamma$ ), allowing a more nuanced comparison of responses between vaccine platform and  
255 regimen. Looking first at all DBPRII-specific effector memory CD4+ T cells – based on  
256 secretion of any cytokine following stimulation with the DBPRII peptide pool (**Table 3**) – we  
257 observed significantly higher frequencies in protein/adjuvant vaccinees at FV+7 as  
258 compared to viral vector vaccinees, but no difference between dosing regimens (**Figure 4A-**  
259 **B**). Within the same effector memory CD4+ T cell population, we next assessed total Th1  
260 (defined as IFN- $\gamma$  and/or IL-2 and/or TNF- $\alpha$ ) and Th2 responses (IL-5 and/or IL-13). Both  
261 platforms induced Th1 cytokine production and there were no significant differences  
262 between platforms or dosing regimens (**Figure 4C-D**). In contrast, the protein/adjuvant  
263 vaccines drove higher frequency Th2 responses, comparable across different dosing  
264 regimens (**Figure 4E-F**). Trends were similar for both IL-5 and IL-13, although the magnitude  
265 of DBPRII-specific IL-5-producing cells was higher (median [range] % DBPRII-specific cells  
266 within effector memory CD4+ T cells at FV+7: VV IL-5 = 0.04% [0.00-0.10%], PA IL-5 =  
267 0.60% [0.06-1.35%]; IL-13 VV 0.02% [0.00-0.06%], PA IL-13 = 0.06% [0.02-0.42%]).

268

269 Finally, we similarly quantified the effector memory CD8+ T cell response. Here, higher IFN-  
270  $\gamma$  responses were observed with the viral vector platform; no significant responses were  
271 observed within the protein/adjuvant platform (**Supplemental Figure 9**).



272

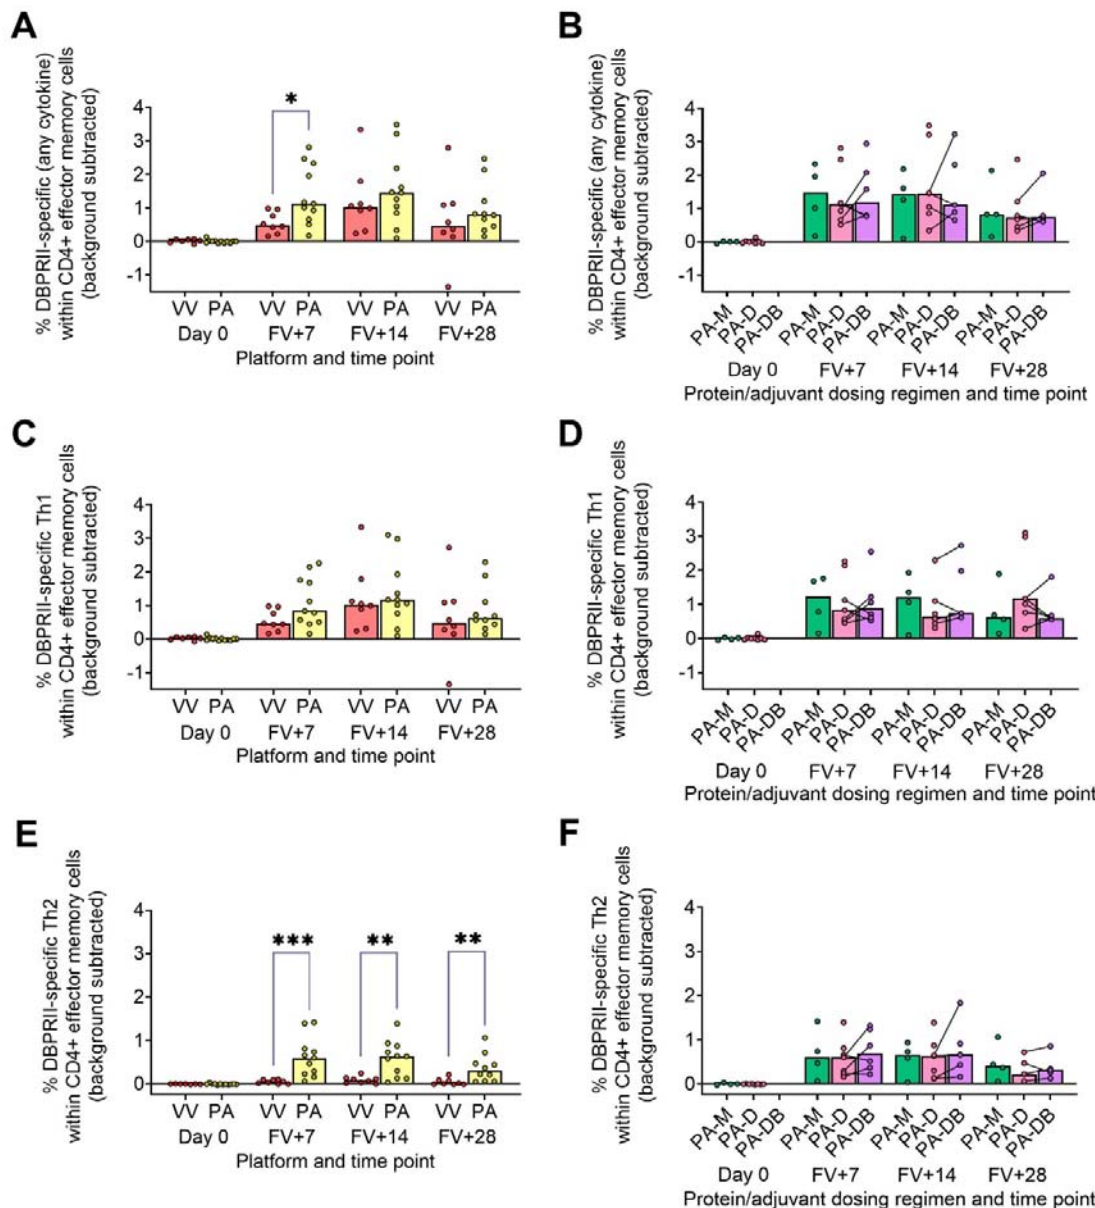

273

274

Figure 4. DBPRII-specific CD4+ effector memory T cell responses.

275

PBMC from pre-vaccination (Day 0) and post-final vaccination (FV) time points were analysed for T cell

276

responses by intracellular cytokine staining; gating strategies are as described in Methods and **Supplemental**

277

**Figure 9**. In brief, DBPRII-specific effector memory CD4+ T cells are reported as frequencies producing

278

cytokines in response to peptide stimulation after background subtraction of cytokine-positive cells in matched

279

samples cultured with media alone. DBPRII-specific responses were compared between vaccine platforms or

280

protein/adjuvant dosing regimens as defined by production of any cytokine [IL-2, IL-5, IL-13, IFN- $\gamma$ , TNF- $\alpha$ ] (**A-B**),

281

any Th1 cytokine [IL-2, IFN- $\gamma$ , TNF- $\alpha$ ] (**C-D**), or any Th2 cytokine [IL-5, IL-13] (**E-F**). CD8+ effector memory T cell

282

responses are shown in **Supplemental Figure 9**. VV = ChAd63-MVA viral vectors; PA = PvDBPII

283

protein/adjuvant [PA-M and PA-D]; PA-M = PvDBPII protein/adjuvant monthly dosing; PA-D = PvDBPII

284

protein/adjuvant delayed booster dosing; PA-DB = PvDBPII protein/adjuvant delayed booster dosing with extra

285

booster. Post-vaccination comparisons were performed between PvDBPII platforms by Mann Whitney U test (**A**,

286

**C**, **E**), or protein/adjuvant dosing regimens by Kruskal Wallis test with Dunn's correction for multiple comparisons

287

(**B**, **D**, **F**). Sample sizes for all assays were based on sample availability; each circle represents a single sample.

288

(**A**, **C**, **E**) VV/PA: Day 0 = 7/12, FV+7 = 8/11, FV+14 = 8/11, FV+28 = 8/10. (**B**, **D**, **E**) PA-M/PA-D/PA-DB: Day 0 =

289

4/8/na, FV+7 = 4/7/6, FV+14 = 4/7/5, FV+28 = 4/6/5. PA-D vaccinees returning in the PA-DB group are

290

connected by lines. Bars represent medians. \*  $p < 0.05$ , \*\*  $p < 0.01$ , \*\*\*  $p < 0.001$ .

291 DBPRII-specific B cell responses correlate with *in vivo* efficacy against *P. vivax*  
292 parasites and durability of anti-DBPRII serum IgG

293 To confirm the biological relevance of increased B cell immunogenicity in delayed dosing  
294 vaccinees we performed Spearman correlations with *in vivo* growth inhibition of blood-stage  
295 parasites following *P. vivax* CHMI [11]. The magnitude of the circulating DBPRII-specific  
296 memory IgG+ B cell response correlated strongly with IVGI (**Figure 5A**), as did the  
297 frequency of DBPRII-specific plasma cells (**Figure 5B**). Since IVGI is calculated over a  
298 relatively short time frame following parasite inoculation, we were also interested in  
299 assessing the relationship between these B cell responses and the fold change in serum  
300 antibody between the peak (FV+14) and a later time point (C+96, approximately 16-weeks  
301 later; **Figure 3G**). DBPRII-specific IgG+ memory B cells again correlated strongly with  
302 durable serum anti-DBPRII IgG responses (**Figure 5C**), while no association was observed  
303 with peak FV+7 plasma cells (**Figure 5D**). Neither IVGI nor serum antibody maintenance  
304 correlated with DBPRII-specific Th2 effector memory CD4+ T cell responses (data not  
305 shown), suggesting a lesser role for T cell immunogenicity in DBPRII vaccine-mediated  
306 protection.

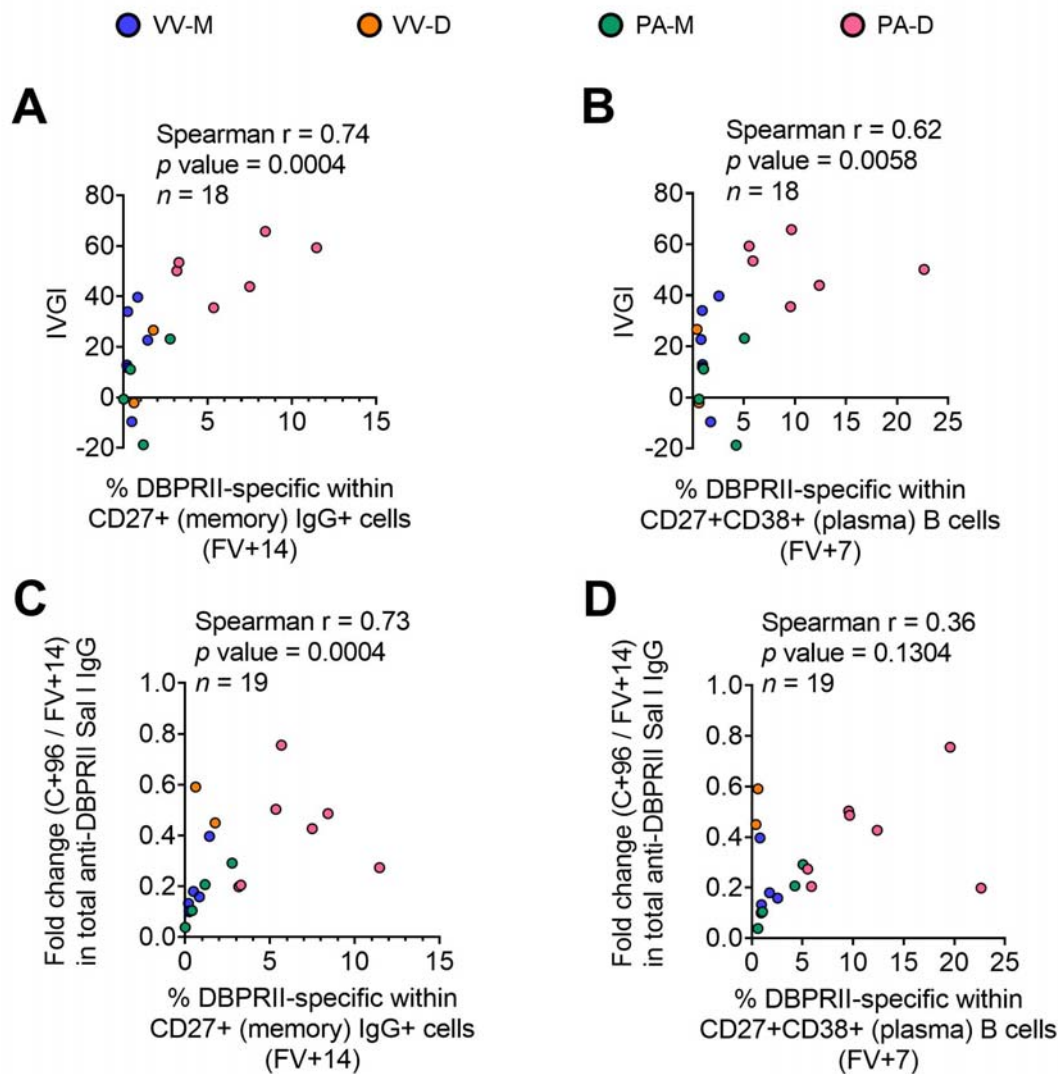

307  
 308 Figure 5. Correlations between circulating DBPRII-specific B cells and *in vivo* growth inhibition of *P.*  
 309 *vivax* parasites or maintenance of serum antibody.  
 310 *In vivo* growth inhibition (IVGI) of *P. vivax* parasites following post-vaccination controlled human malaria infection  
 311 (CHMI) was calculated from qPCR data as described in the Methods. Spearman correlations were performed  
 312 between IVGI and the peak frequency of DBPRII-specific memory IgG+ B cells at FV+14 (A) or plasma cells at  
 313 FV+7 (B) as defined in **Supplemental Figure 1** and reported in **Figure 1**. Spearman correlations were also  
 314 performed between C+96/FV+14 fold change in total anti-DBPRII IgG (Sal I strain; see **Figure 3**) and memory  
 315 IgG+ B cells at FV+14 (C) or plasma cell at FV+28 (D). VV-M = ChAd63-MVA viral vector monthly dosing; VV-D  
 316 ChAd63-MVA delayed booster dosing; PA-M = protein/adjuvant monthly dosing; PA-D = protein/adjuvant delayed  
 317 booster dosing. C+96 = 96 days after controlled human malaria infection (approximately 16-weeks after FV).  
 318 Spearman rho,  $p$  values and sample sizes are annotated on individual graphs. Each circle represents a single  
 319 sample.



320 Bone marrow plasma cells correlate with serum antibody and circulating memory B  
321 cells in adult RH5.1/Matrix-M<sup>TM</sup> vaccinees

322 While bone marrow aspirates were not taken in the DBPRII clinical trials, we had the rare  
323 opportunity to investigate bone marrow plasma cells with the RH5.1/Matrix-M<sup>TM</sup> adult  
324 vaccinees – the first bone marrow analyses in the context of malaria vaccination [13]. Here,  
325 we observed a trend to higher frequencies of RH5-specific cells within total bone marrow B  
326 cells in the delayed dosing regimen (**Figure 6A**) which correlated strongly with matched time  
327 point serum anti-RH5 IgG (**Figure 6B**). We were also interested to see if the frequencies of  
328 RH5-specific cells within circulating B cell populations of interest correlated with vaccine-  
329 specific seeding of the bone marrow. We therefore performed additional Spearman  
330 correlation analyses between the frequency of RH5-specific cells within “Population 12”  
331 (CD19+CD20+CD21+CD27+ CD138-CD38+IgA-IgM-IgG+; the B cell population with  
332 greatest differences between regimens) at both matched time points (i.e. V1 or FV+28;  
333 **Figure 6C**) or with FV+14 (**Figure 6D**). We observe strong correlations between RH5-  
334 specific circulating memory B cells and bone marrow plasma cells at both time points.  
335 Similar results were obtained if correlations were performed with RH5-specific  
336 CD19+CD27+IgG+ B cells (**Figure 1F**; data not shown). RH5-specific bone marrow B cells  
337 did not correlate with circulating RH5-specific CD27+CD38+ (plasma) cells at FV+7 (data not  
338 shown).

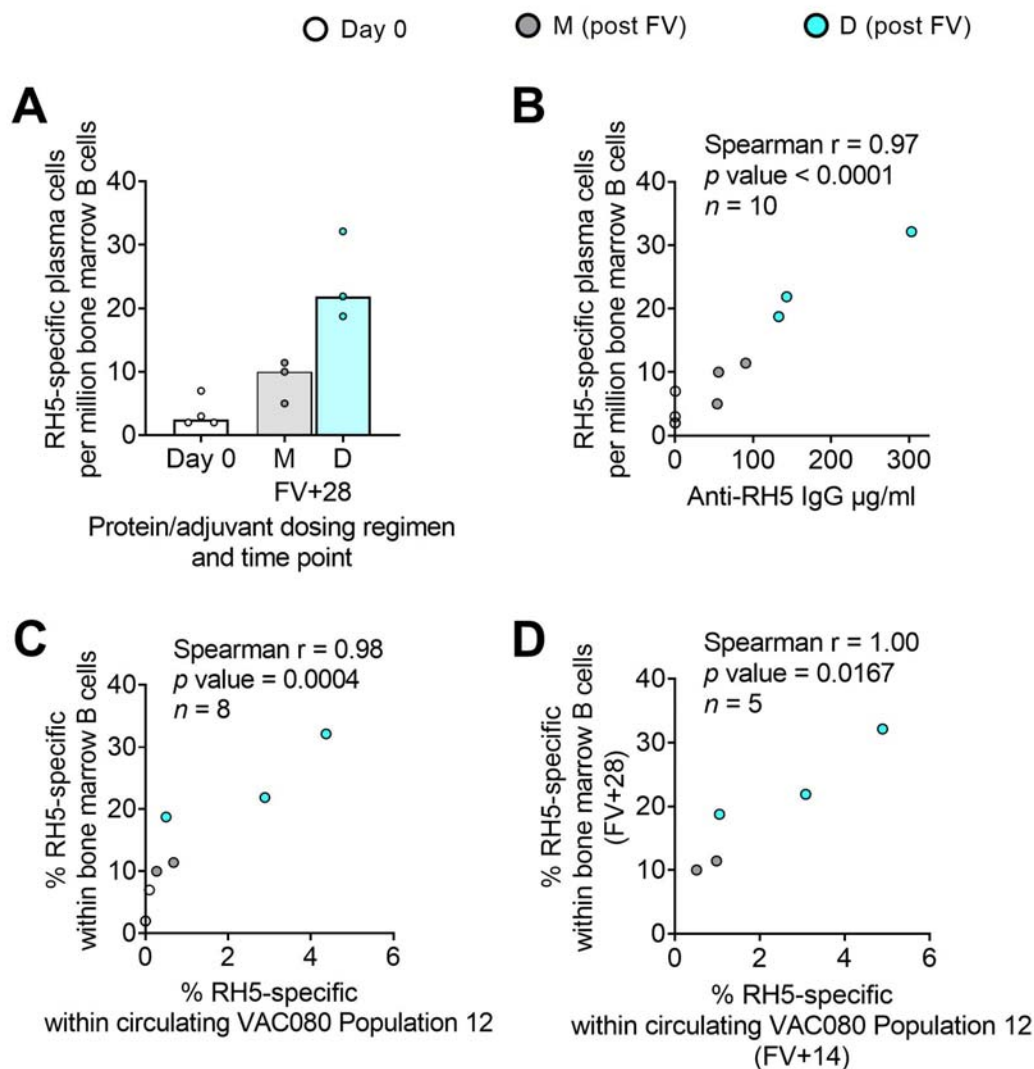

339  
 340  
 341  
 342  
 343  
 344  
 345  
 346  
 347  
 348  
 349  
 350  
 351  
 352

Figure 6. RH5-specific bone marrow plasma cell responses and correlations with serum antibody or circulating RH5-specific cells.

RH5-specific bone marrow plasma cells were detected in B cells enriched from pre- and post-final vaccination (FV) bone marrow mononuclear cells and assayed by IgG antibody-secreting cell ELISPOT as described in the Methods. The frequency of RH5-specific IgG plasma cell (antibody-secreting cell) per million bone marrow B cells was compared between dosing regimens (A). Spearman correlation analyses were performed between RH5-specific bone marrow B cells and matched time point serum IgG (B), matched time point frequency of RH5-specific cells within CITRUS-guided “Population 12” [CD19+CD20+CD21+CD27+CD138- CD38+IgM-IgA-IgG+; see Table 2, Figure 2, Supplemental Figure 5] (C), and between RH5-specific bone marrow B cells at FV+28 and Population 12 at FV+14 (D). M = RH5.1/adjuvant monthly dosing; D = RH5.1/adjuvant delayed booster dosing. Post-vaccination comparisons were performed between dosing regimens by Mann Whitney U test (A; not significant). Spearman rho, p values and sample sizes are annotated on individual graphs. Each circle represents a single sample.

## 353 Discussion

354 The data presented here contribute to growing efforts seeking to understand the impact of  
355 modifiable vaccine delivery parameters – i.e. vaccine platform or dosing regimen – on  
356 protective immune responses. Using samples from independent clinical trials with the blood-  
357 stage malaria antigens DBPRII and RH5, we observe a hierarchy of serum antibody and B  
358 cell immunogenicity from heterologous viral vectors to monthly protein/adjuvant booster  
359 dosing to delayed booster protein/adjuvant vaccination. Consistent with a role for vaccine-  
360 specific B cells in sustained humoral immunity, circulating plasma or memory B cell  
361 responses correlate with available *in vivo* growth inhibition (IVGI) and durable serum IgG  
362 data from the DBPRII trial. In fact, DBPRII-specific memory IgG+ B cells correlate more  
363 strongly with IVGI than our previously reported associations between IVGI and serum anti-  
364 DBPRII IgG, DARC (the DBP ligand) binding inhibition, or *in vitro* growth inhibitory activity  
365 (GIA) with a transgenic *P. knowlesi* strain expressing *P. vivax* DBPRII [11]). In contrast,  
366 while differences in CD4+ and CD8+ T cell responses are observed between platforms by  
367 intracellular cytokine staining (ICS), there are no discernible differences between  
368 protein/adjuvant dosing regimens and no correlation is observed between IVGI and T cell  
369 immunogenicity [11].

370

371 Our conclusions are in line with data published by Payne *et al.* showing an increase in  
372 SARS-CoV-2 spike-specific IgG+ antibody-secreting B cells by ELISPOT 4-weeks after the  
373 second dose with longer intervals between BNT162b2 mRNA doses in naïve vaccinees  
374 (median = 3.4 weeks, versus median = 10.1 weeks). More mixed results were observed with  
375 T cell immunogenicity. For example, the authors observed decreased spike-specific IFN- $\gamma$   
376 ELISPOT responses and CD8+ IFN- $\gamma$  by ICS, alongside increased spike-specific CD4+ IL-2  
377 and IFN- $\gamma$  by ICS [3]). Likewise, recent work from Nicolas *et al.* reported “long interval” (i.e.  
378 delayed) booster dosing increases circulating SARS-CoV-2 RBD-specific IgG+ B cells 1-3  
379 weeks after the second mRNA dose, without driving major differences in memory CD4+ or

380 CD8+ T cells (as measured by activation-induced marker [AIM] or ICS [14]). Our own  
381 previously published work with a similar AIM assay in the context of a UK RH5.1/AS01  
382 Phase I vaccine trial showed no effect of delayed boosting on the magnitude of the Tfh cell  
383 response, but we did detect a slight shift towards a Tfh2 phenotype as compared to monthly  
384 boosting vaccinees [4]. To note, the Nicolas *et al.* study compared “short” (median = 3.0  
385 weeks) and “long” (median = 15.8 weeks) intervals between the two mRNA doses similar to  
386 the spacing between 2<sup>nd</sup> and 3<sup>rd</sup> doses in the RH5 and CSP (RTS,S) trials. However, for  
387 many comparisons of parameters between the malaria and SARS-CoV-2 fields it is  
388 important to remember that the “delay” is often less substantial in SARS-CoV-2 trials (i.e. a  
389 few weeks [1; 2; 3], rather than several months as tested with DBPRII/ RH5/ CSP- based  
390 vaccines [4; 5; 6; 7; 8; 9; 11]). We are far from understanding the optimal spacing of booster  
391 doses, but if the benefit to B cell immunogenicity with delayed booster vaccination relates to  
392 allowing circulating antibody and/or ongoing germinal centres to wane – as we have  
393 previously proposed [5] – then it seems likely that this difference of weeks versus months will  
394 be immunologically relevant.

395

396 Our approach to the B cell flow cytometry analyses also incorporated an agnostic approach  
397 to identifying the main circulating B cells populations through use of the CITRUS clustering  
398 tool. Significant post-vaccination responses were observed within DBPRII “Population 1” and  
399 RH5 “Population 12”, which appear to be subsets of the resting memory populations.  
400 Interestingly, within the DBPRII trial, substantial post-vaccination responses within the  
401 protein/adjuvant delayed boosting groups were detected in a new “Population 2” (CD19-  
402 CD20-CD21-CD27-CD138-CD38+IgM-IgA-IgG+). This was an unexpected observation that  
403 would have been missed with traditional B cell analytical approaches that start from the  
404 premise that all B cells are CD19+. Given our flow cytometry assay includes a negative pan  
405 B cell enrichment step and IgG expression is not expected on other lymphocytes, it is likely  
406 that the vast majority of these CD38+IgG+ cells are true B cells. At present, there appears to  
407 be limited and conflicting published data on similar (healthy) human vaccine-specific CD19-

408 B cells in circulation. For example, Arumugakani *et al.* have reported on influenza-specific  
409 IgG-secreting CD19-CD20-CD38hi cells by ELISPOT and concluded this population was at  
410 the plasmablast to mature plasma cell transition, but in contrast to our “Population 2” data  
411 this population was also CD27hi [15]. Conversely, Mei *et al.* did not detect post-vaccination  
412 tetanus-toxoid specific cells within circulating CD19-CD38+IgG+ B cells by intracellular  
413 probe staining and concluded plasma cell CD19 downregulation does not occur until *in situ*  
414 in the bone marrow [16].

415

416 In light of the interest in CD19- B cells in the context of long-lived plasma cell responses  
417 future trials with larger sample sizes should include immunokinetic investigations of CD19-  
418 subpopulations and their biological significance. Indeed, of great interest is the strong  
419 correlation detected between circulating serum IgG or memory B cells and vaccine-specific  
420 bone marrow plasma cells in the RH5 trial. Very few vaccine studies have included lymphoid  
421 tissue sampling (reviewed in [13]) and, to the best of our knowledge, this trial represents the  
422 first direct analysis of human bone marrow-resident plasma cells in the context of malaria.  
423 Since long-term serum antibody is maintained through secretion by long-lived plasma cells in  
424 the bone marrow, understanding the factors that impact this compartment is central to  
425 optimising durability of humoral immunity. Our data strongly suggest that delayed dosing  
426 improves seeding of bone marrow plasma cells, as compared to monthly booster dosing.  
427 Future studies should build on these exciting findings with larger sample sizes or sample  
428 volumes, which would permit more detailed analyses of populations of interest such as the  
429 putative long-lived plasma cell population (CD19-CD38+CD138+ [16; 17; 18]) within total  
430 bone marrow plasma cells.

431

432 There are also several aspects of the DBPRII serology data that deserve further comment.  
433 Firstly, it is interesting to note that median peak responses after an additional booster  
434 vaccination (PA-DB vs PA-D) are lower across the majority of isotypes and subclasses  
435 measured. This is mirrored in the DBPRII-specific B cell data and indeed reaches statistical

436 significance for the CD27+CD38+ plasma cell response. The exception is serum IgG4 which  
437 trends to a higher peak concentration following PA-DB as compared to the PA-D regimen,  
438 and in fact we have previously observed an enhanced IgG4 response with higher antigen  
439 doses of RH5.1/AS01 in an equivalent UK population [5]. Secondly, we were surprised by  
440 the absence of detectable IgG2 following vaccination with any of the platform/ regimens.  
441 This is in contrast to the previous RH5 analyses where we observed a (low) IgG2 response  
442 to both monthly and delayed booster dosing regimens, with better serum maintenance in the  
443 latter group [5]. Finally, while intragroup variation and small sample sizes reduced the  
444 statistical power to detect differences in the IgM analyses, it is interesting to note that  
445 median responses were higher in the monthly as compared to delayed dosing regimens  
446 (FV+14: PA-M = 1708 AU, PA-D = 119.8 AU, PA-DB = 126.0 AU; FV+28: PA-M = 794.1 AU,  
447 PA-D = 204.4 AU, PA-DB = 129.4 AU). Although frequencies of DBPRII-specific B cells  
448 within the memory IgM+ population were very low, these did trend to slightly higher medians  
449 at FV+28 and correlate with serum IgM (Spearman  $r = 0.69$ ,  $p = 0.0014$ ,  $n = 18$ ).

450

451 Given the multitude of parameters assayed, machine learning – such as with the SIMON  
452 platform [19] – would have been a useful strategy for interrogating which read-out or set of  
453 read-outs best predicted our trial outcomes of interest e.g. peak vaccine-specific IgG, IVGI  
454 (DBPRII trial only) or seeding of bone marrow plasma cells (RH5 trial only). Unfortunately,  
455 this approach was precluded by insufficient sample size. Indeed, the small sample sizes of  
456 the different vaccination groups represents the main limitation of our analyses for both trials.

457

458 To conclude, our data indicate that while changing vaccine platform drives broad effects on  
459 post-vaccination immune responses, modulating booster dosing regimen more narrowly  
460 impacts humoral immunity. Importantly, these differences in immunogenicity appear to have  
461 relevance for protection from *P. vivax* in a CHMI model. While this investigation of the  
462 delayed booster regimen was a serendipitous effect of the SARS-CoV-2 pandemic – not  
463 unlike the original delayed fractional booster observations with RTS,S [6]– it now seems

464 likely that future clinical development of the PvDBP11 candidate will benefit from further  
465 interrogation of delayed booster regimens. These findings are supported by data from an  
466 independent RH5.1/Matrix-M<sup>TM</sup> clinical trial in malaria-exposed adults in Tanzania where  
467 delayed booster dosing not only increases the frequency of circulating RH5-specific memory  
468 B cells, but also RH5-specific plasma cells in the bone marrow.

## 469 Methods

### 470 Clinical trials

471 This study focused on the comparison of immune responses between groups vaccinated  
472 with the *Plasmodium vivax* antigen DBPRII with different platforms and dosing regimens  
473 (**Table 1** [11]). In brief, two Phase I/IIa vaccine efficacy trials (NCT04009096 and  
474 NCT04201431) were conducted in parallel at a single site in the UK (Centre for Clinical  
475 Vaccinology and Tropical Medicine, University of Oxford). NCT04009096 was an open label  
476 trial to assess the ChAd63 and MVA viral-vectored vaccines encoding PvDBPII (VV-  
477 PvDBPII), while the NCT04201431 trial assessed the protein vaccine PvDBPII in Matrix-M™  
478 adjuvant from Novavax (PvDBPII/M-M). NCT04009096 viral vectors were administered at 0,  
479 2 months (VV-M) or in a delayed dosing regimen (0, 17, 19 months; VV-D). For  
480 NCT04201431, the protein/adjuvant was administered monthly (0, 1, 2 months; PA-M) or in  
481 a delayed dosing regimen (0, 1, 14 months; PA-D). A subset of vaccinees from the  
482 protein/adjuvant delayed dosing regimen returned for an additional booster at 19 months  
483 (PA-DB). ChAd63-PvDBPII was administered at a dose of  $5 \times 10^{10}$  viral particles, MVA-  
484 PvDBPII at  $2 \times 10^8$  plaque forming units, and PvDBPII protein at 50µg mixed with 50µg  
485 Matrix-M™. Delayed regimens were due to trial halts during the pandemic. Eligible  
486 vaccinees were healthy, Duffy-positive, malaria-naïve adults, aged 18 to 45 years. Trials  
487 were approved by the UK National Health Service Research Ethics Services (REC;  
488 references 19/SC/0193 and 19/SC/0330) as well as by the UK Medicine and Healthcare  
489 products Regulatory Agency (MHRA; reference CTA 21584/0414/001-0001 and CTA  
490 21584/0418/001-0001). All vaccinees gave written informed consent.

491

492 This study also includes analyses of samples from a further Phase Ib clinical trial with  
493 *Plasmodium falciparum* vaccine candidate RH5.1 (50µg) in Matrix-M™ adjuvant (50µg) in  
494 malaria-endemic setting in Tanzania (NCT04318002). RH5.1/Matrix-M™ was administered  
495 at either a monthly 0, 1, 2 months (M) or delayed 0, 1, 6 months (D) booster regimen. The



496 final vaccination in the delayed booster regimen was given at a fractionated RH5.1 antigen  
497 dose of 10µg, rather than 50µg (the dose of Matrix-M™ was not fractionated and remained  
498 50 µg). Eligible vaccinees were healthy adults (negative for malaria by blood smear at  
499 screening), aged 18 to 45 years. The trial was approved by the Tanzanian Medicines and  
500 Medical Devices Authority (reference TMDA0020/CTR/0006/01), the National Institute for  
501 Medical Research (references NIMR/HQ/R.8a/Vol.IX/3537 and NIMR/HQ/R.8c/Vol.1/1887),  
502 the Ifakara Health Institute Institutional Review Board (reference IHI/IRB/No:49-2020), and  
503 the Oxford Tropical Research Ethics Committee (reference 9-20). All vaccinees gave written  
504 informed consent.

505

## 506 [Methods details](#)

### 507 [Flow cytometry – B cells](#)

508 Cryopreserved PBMC from the DBPRII trial were thawed into R10 media (RPMI [R0883,  
509 Sigma] supplemented with 10% heat-inactivated FCS [60923, Biosera], 100U/ml penicillin /  
510 0.1mg/mL streptomycin [P0781, Sigma], 2mM L-glutamine [G7513, Sigma]) then washed  
511 and rested in R10 for 1h. B cells were enriched (Human Pan-B cell Enrichment Kit [19554,  
512 StemCell]) and then stained with viability dye FVS780 (565388, BD Biosciences). Next, B  
513 cells were stained with anti-human CD19-BV786 (563325, BD Biosciences), anti-human  
514 CD20-BUV395 (563782, BD Biosciences), anti-human IgG-BB515 (564581, BD  
515 Biosciences), anti-human IgM-BV605 (562977, BD Biosciences), anti-human CD27-PE-Cy7  
516 (560609, BD Biosciences), anti-human CD21-BV711 (563163, BD Biosciences), anti-human  
517 CD38-BV480 (566137, BD Biosciences), anti-human CD138-APC-R700 (566050, BD  
518 Biosciences), anti-human IgA-PerCP-Vio700 (130-113-478, Miltenyi) as well as two  
519 fluorophore-conjugated DBPRII probes. Preparation of the DBPRII probes was based on our  
520 previously published protocols with the *P. falciparum* blood-stage malaria antigen RH5 [12;  
521 20]. In brief, monobiotinylated DBPRII was produced by transient co-transfection of  
522 HEK293F cells with a plasmid encoding BirA biotin ligase and a plasmid encoding a

523 monoFC-fused, biotin acceptor peptide- and c-tagged full-length DBPRII. Monobiotinylated  
524 DBPRII was purified by affinity chromatography (c-tag) and size exclusion chromatography.  
525 The monoFC solubilisation domain was cleaved using TEV protease. Probes were freshly  
526 prepared for each experiment, by incubation of monobiotinylated DBPRII with streptavidin-  
527 PE (S866, Invitrogen) or streptavidin-APC (Biolegend, 17-4317-82) at an approximately 4:1  
528 molar ratio to facilitate tetramer generation and subsequently centrifuging to remove  
529 aggregates. Following surface staining, cells were permeabilised and fixed with Transcription  
530 Factor Buffer Set (562574, BD Biosciences), stained with anti-human Ki67-BV650 (563757,  
531 BD Biosciences), washed, and stored at 4°C until acquisition. Samples were acquired on a  
532 Fortessa X20 flow cytometer with FACSDiva8.0 (both BD Biosciences). Samples were  
533 analysed using FlowJo (v10; Treestar). Samples were excluded from analysis if <50 cells in  
534 the parent population.

535

536 The B cell assay with cryopreserved samples from the RH5 clinical trial was performed as  
537 above with two modifications to the protocol. First, RH5 probes rather than DBPRII probes  
538 were used as previously described [12; 20]. Second, probe staining was repeated during the  
539 intracellular cytokine staining step at a 1/10 dilution as compared to concentrations used for  
540 surface staining.

541

542 See below for details of CITRUS analyses with B cell flow cytometry samples.

543

#### 544 Flow cytometry – T cells

545 DBPRII peptide stimulation was used to detect DBPRII-specific T cells in an intracellular  
546 cytokine staining (ICS) assay as previously described [11]. Cryopreserved PBMC were  
547 thawed in R10 and rested before an 18h stimulation with medium alone, 2.5 µg/peptide/mL  
548 of a PvDBPII 20mer peptide pool (Mimotopes; **Table 3**), or 1 µg/mL Staphylococcal  
549 enterotoxin B (SEB; S-4881, Sigma; positive control). Anti-CD28 (1µg/ml; 16-0289-85,

550 eBioscience), anti-CD49d (1µg/ml; 16-0499-85, eBioscience) and anti-CD107a-PE-Cy5 (15-  
551 1079-42, eBioscience) were included in the cell culture medium. Brefeldin A (00-4506-51,  
552 eBioscience) and monensin (00-4505-51, eBioscience) were added after 2h. Following  
553 incubation, PBMC were stained with viability dye Live/Dead Aqua (L34966, Invitrogen) and  
554 anti-human CCR7-BV711 (353228, Biolegend). Cells were then permeabilised and fixed with  
555 Cytotfix/Cytoperm (554714, BD Biosciences) before staining with anti-human CD14-eF450  
556 (48-0149-42, eBioscience), anti-human CD19-eFl450 (48-0199-42, eBioscience), anti-  
557 human CD8a-APC-eF780 (47-0088-42, eBioscience), anti-human IFN-γ-FITC (11-7319-82,  
558 eBioscience), anti-human TNFα-PE-Cy7 (25-7349-8, eBioscience), anti-human CD3-AF700  
559 (56-0038-82, eBioscience), anti-CD4-PerCP Cy5.5 (300530, Biolegend), anti-human IL-2-  
560 BV650 (500334, Biolegend), anti-human IL5-PE (500904, Biolegend), anti-human IL13-APC  
561 (501907 Biolegend), anti-human CD45RA-BV605 (304134, Biolegend). Finally, cells were  
562 washed, and stored at 4°C until acquisition. Samples were acquired on a Fortessa X20 flow  
563 cytometer with FACSDiva8.0 (both BD Biosciences). Samples were analysed using FlowJo  
564 (v10; Treestar). Background cytokine responses to medium alone were subtracted from  
565 DBPRII-specific responses. Samples were excluded from analysis if <50 cells in the parent  
566 population.

567 **Table 3. Peptide pool for T cell stimulation.** The PvDBP II Sall amino acid sequence was  
 568 used to design 20mer peptides overlapping by 12 amino acids and these were synthesized  
 569 by Mimotopes, Australia. Each stock was reconstituted to 50mg/mL in DMSO. A  
 570 200µg/peptide/mL working stock of PvDBP II peptides was prepared by adding an equal  
 571 amount of each peptide to cell culture medium for a final total peptide concentration of  
 572 8mg/mL.

| Peptide Number | N-terminus | Amino Acid Sequence           | C-terminus       |
|----------------|------------|-------------------------------|------------------|
| 1              | H-         | DHKKTISSAIINHAF LQNTVGSG(261) | -NH <sub>2</sub> |
| 2              | Biotin-    | SGSGAIINHAF LQNTVMKNCNYKR     | -NH <sub>2</sub> |
| 3              | Biotin-    | SGSGQNTVMKNCNYKRKRERDWD       | -NH <sub>2</sub> |
| 4              | Biotin-    | SGSGNYKRKRERDWD CNTKKDVC      | -NH <sub>2</sub> |
| 5              | Biotin-    | SGSGRDWDCNTKKDVCIPDRRYQL      | -NH <sub>2</sub> |
| 6              | Biotin-    | SGSGKDVCIPDRRYQLCMKELTNL      | -NH <sub>2</sub> |
| 7              | Biotin-    | SGSGRYQLCMKELTNLVNNTDTNF      | -NH <sub>2</sub> |
| 8              | Biotin-    | SGSGLTNLVNNTDTNFHRDITFRK      | -NH <sub>2</sub> |
| 9              | Biotin-    | SGSGDTNFHRDITFRKLYLKRKLI      | -NH <sub>2</sub> |
| 10             | Biotin-    | SGSGTFRKLYLKRKLIYDAVEGD       | -NH <sub>2</sub> |
| 11             | Biotin-    | SGSGRKLIYDAVEGDLLLKLNNY       | -NH <sub>2</sub> |
| 12             | Biotin-    | SGSGVEGDLLLKLNNYRYNKDFCK      | -NH <sub>2</sub> |
| 13             | Biotin-    | SGSGLNNYRYNKDFCKDIRWSLGD      | -NH <sub>2</sub> |
| 14             | Biotin-    | SGSGDFCKDIRWSLGD FGDIIIMGT    | -NH <sub>2</sub> |
| 15             | Biotin-    | SGSGSLGDFGDIIIMGTMEGIGYS      | -NH <sub>2</sub> |
| 16             | Biotin-    | SGSGIMGTMEGIGYSKVVENNL R      | -NH <sub>2</sub> |
| 17             | Biotin-    | SGSGIGYSKVVENNLRSIFGTDEK      | -NH <sub>2</sub> |
| 18             | Biotin-    | SGSGNNLRSIFGTDEKAQQRKQW       | -NH <sub>2</sub> |
| 19             | Biotin-    | SGSGTDEKAQQRKQWWNESKAQI       | -NH <sub>2</sub> |
| 20             | Biotin-    | SGSGRKQWWNESKAQIWTAMMYSV      | -NH <sub>2</sub> |
| 21             | Biotin-    | SGSGKAQIWTAMMYSVKKRLKGNF      | -NH <sub>2</sub> |
| 22             | Biotin-    | SGSGMYSVKKRLKGNFIWICKLNV      | -NH <sub>2</sub> |
| 23             | Biotin-    | SGSGKGNFIWICKLNVAVNIEPQI      | -NH <sub>2</sub> |
| 24             | Biotin-    | SGSGKLNVAVNIEPQIYRWIREWG      | -NH <sub>2</sub> |
| 25             | Biotin-    | SGSGEPQIYRWIREWGRDYVSELP      | -NH <sub>2</sub> |
| 26             | Biotin-    | SGSGREWGRDYVSELPTEVQKLKE      | -NH <sub>2</sub> |
| 27             | Biotin-    | SGSGSELPTEVQKLKEKCDGKINY      | -NH <sub>2</sub> |
| 28             | Biotin-    | SGSGKLKEKCDGKINYTDKKVCKV      | -NH <sub>2</sub> |
| 29             | Biotin-    | SGSGKINYTDKKVCKVPPCQNACK      | -NH <sub>2</sub> |
| 30             | Biotin-    | SGSGVCKVPPCQNACKSYDQWITR      | -NH <sub>2</sub> |
| 31             | Biotin-    | SGSGNACKSYDQWITRKKNQWDVL      | -NH <sub>2</sub> |
| 32             | Biotin-    | SGSGWITRKKNQWDVLSNKFISVK      | -NH <sub>2</sub> |
| 33             | Biotin-    | SGSGWDVLSNKFISVKNAEKVQTA      | -NH <sub>2</sub> |
| 34             | Biotin-    | SGSGISVKNAEKVQTAGIVTPYDI      | -NH <sub>2</sub> |
| 35             | Biotin-    | SGSGVQTAGIVTPYDILKQELDEF      | -NH <sub>2</sub> |
| 36             | Biotin-    | SGSGPYDILKQELDEFNEVAFENE      | -NH <sub>2</sub> |
| 37             | Biotin-    | SGSGLDEFNEVAFENEINKRDGAY      | -NH <sub>2</sub> |
| 38             | Biotin-    | SGSGFENEINKRDGAYIELCVCSV      | -NH <sub>2</sub> |
| 39             | Biotin-    | SGSGDGAYIELCVCSVEEAKKNTQ      | -NH <sub>2</sub> |
| 40             | Biotin-    | SGSGIELCVCSVEEAKKNTQEVVT      | -OH              |

573

## 574 ELISAs

575 For the DBPRII clinical trial, antigen-specific total IgG, IgG3, IgG4, IgA, IgA1 and IgM titres  
576 were determined by standardised ELISA in accordance with published methodology [21].  
577 Nunc MaxiSorp™ flat-bottom ELISA plates (44-2404-21, Invitrogen) were coated overnight  
578 with 2µg/mL (for total IgG titres) or 5µg/mL (for IgG1, IgG3, IgG4, IgA, IgA1 and IgM titres) of  
579 DBPRII Sall protein or 2µg/mL of sd3 protein in PBS. DBPRII protein was produced as  
580 previously described [11], while sd3 protein was produced by transient transfection of  
581 Expi395F cells with a plasmid encoding a monoFc, DBP Subdomain 3 (sequence as per  
582 UniProt P22290 PVDR residues P387-S508) and a C-terminal c-tag. The monoFc was  
583 cleaved using TEV protease and sd3 was purified by affinity chromatography (c-tag) and  
584 size exclusion chromatography. Plates were washed with washing buffer composed of PBS  
585 containing 0.05% TWEEN® 20 (P1379, Sigma-Aldrich) and blocked with 100µL of Starting  
586 Block™ T20 (37538, ThermoFisher Scientific). After removing blocking buffer, standard  
587 curve and internal controls were diluted in blocking buffer using a pool of high-titre vaccinee  
588 plasma or serum, specific for each antigen and isotype or subclass being tested, and 50µL  
589 of each dilution was added to the plate in duplicate. Test samples were diluted in blocking  
590 buffer to a minimum dilution of 1:50 (or 1:100 for total IgG) and 50µL was added in triplicate.  
591 Plates were incubated for 2 hours at 37°C (or 20°C for total IgG) and washed in washing  
592 buffer. An alkaline phosphatase-conjugated secondary antibody was diluted at the  
593 manufacturer's recommend minimum dilution for ELISA in blocking buffer. The antibody  
594 used was dependent on the isotype or subclass being assayed and were as follows: IgG-AP  
595 (A3187, Thermo Scientific), IgG1 Fc-AP (9054-04, Southern Biotech), IgG3 Hinge-AP (9210-  
596 04, Southern Biotech), IgG4 Fc-AP (9200-04, Southern Biotech), IgA-AP (2050-04, Southern  
597 Biotech), IgA1-AP (9130-04, Southern Biotech), and IgM-AP (2020-04, Southern Biotech).  
598 50µL of the secondary antibody dilution was added to each well of the plate and incubated  
599 for 1 h at 37°C (or 20°C for total IgG). Plates were developed using PNPP alkaline  
600 phosphatase substrate (N2765, Sigma-Aldrich) for 1-4 h at 37°C (or approximately 15

601 minutes at 20°C for total IgG). Optical density at 405 nm was measured using an ELx808  
602 absorbance reader (BioTek) until the internal control reached an OD<sub>405</sub> of 1. The reciprocal  
603 of the internal control dilution giving an OD<sub>405</sub> of 1 was used to assign an AU value of the  
604 standard. Gen5 ELISA software v3.04 (BioTek) was used to convert the OD<sub>405</sub> of test  
605 samples into AU values by interpolating from the linear range of the standard curve fitted to  
606 a four-parameter logistics model. Any samples with an OD<sub>405</sub> below the linear range of the  
607 standard curve at the minimum dilution tested were assigned a minimum AU value according  
608 to the lower limit of quantification of the assay. For assessment of IgG2 and IgA2 responses,  
609 no anti-DBPRII IgG2 or IgA2 samples were available for standard curve generation.  
610 Responses were measured on plates coated with 5 µg/mL DBPRII. Four wells were also  
611 coated with RH5.1 protein for development control wells. Each sample was tested in  
612 duplicate with six negative control serum samples and two development control serum  
613 samples on the RH5.1 coated wells from a previous RH5.1/AS01 vaccine trial [4]. Secondary  
614 antibodies used were IgG2 Fd-AP (9080-04) and IgA2-AP (9140-04). The assay was carried  
615 out as above and plates were developed for 2-4 hours at 37°C.

616

617 For the RH5 clinical trial, serum antibody levels to full-length RH5 protein (RH5.1) were  
618 assessed by standardised ELISA methodology as previously described [4; 22]. In brief, the  
619 reciprocal of the test sample dilution giving an optical density of 1.0 at 405nm (OD<sub>405nm</sub>) was  
620 used to assign an ELISA unit value of the standard. The standard curve and Gen5 software  
621 v3.04 (Agilent) was then used to convert the OD<sub>405nm</sub> of test samples to arbitrary units (AU).  
622 Responses are reported in µg/mL using conversion factor from AU generated by calibration-  
623 free concentration analysis (CFCA) as previously reported [22].

624

## 625 Bone marrow aspirate processing and ELISPOTs

626 A single 10mL bone marrow aspirate was collected per vaccinee into EDTA in the RH5 trial.  
627 Bone marrow mononuclear cells (BMMNC) were purified from aspirates by density

628 centrifugation on Lymphoprep (1114545, Axis Shield) following passage through a 70µm  
629 nylon cell strainer (542070, Greiner Bio-One Ltd). BMMNC were cryopreserved for future  
630 use in FCS (S1810, Biosera) with 10% DMSO (D2650, Sigma). Samples were subsequently  
631 thawed and enriched for B cells using a Pan B Cell Enrichment Kit (19554, Stemcell) for  
632 detection of RH5-specific plasma cells with an antibody-secreting cell (ASC) ELISPOT. In  
633 brief, enriched bone marrow B cells were aliquoted onto MAIP ELISpot Plates (MAIPS4510,  
634 Millipore) coated with 5µg/mL RH5 protein, PBS (negative control), or 50µg/mL polyvalent  
635 goat anti-human immunoglobulin (positive control; H1700 Caltag). Plates were incubated for  
636 16-18h at 37°C prior to cell removal and incubation with anti-human IgG conjugated to  
637 alkaline phosphatase (γ-chain specific; 401442, Calbiochem). Finally, plates were developed  
638 with BCIP/NBT (M0711A, Europa Bioproducts) and read on an AID ELISPOT Plate Reader  
639 (AID). To note, for consistency all ASCs are referred to as plasma cells throughout this  
640 report.

641

#### 642 *In vivo* growth inhibition (IVGI)

643 *In vivo* growth inhibition (IVGI) has been reported elsewhere for the DBPRII trial [11]. In brief,  
644 IVGI was calculated for each vaccinee as the percentage reduction in parasite multiplication  
645 rate (PMR) relative to the mean PMR of the unvaccinated controls. PMR was modelled for  
646 each vaccinee based on log<sub>10</sub> transformed qPCR data of the *P. vivax* 18S ribosomal RNA  
647 gene, using a mean of three replicate qPCR results for each vaccinee per time point [11; 23;  
648 24]. Further details of the IVGI/ PMR methodology in this trial can be found in the  
649 Supplementary Appendix of the primary trial report [11].

650

#### 651 Quantification and Statistical Analyses

652 Comparisons were performed between regimens with (two-tailed) Mann-Whitney tests or  
653 Kruskal-Wallis test with Dunn's Correction for multiple comparisons (GraphPad Prism v9). A  
654 *p* value of < 0.05 was considered statistically significant.

655

656 Specifics of the CITRUS analyses are outlined in further detail below. For all data, relevant  
657 statistical tests and sample sizes are specified in figure legends.

658

#### 659 Clustering of B cell flow cytometry data with CITRUS

660 Raw fcs files with file-internal compensation (i.e. acquisition-defined) from the B cell flow  
661 cytometry assays with DBPR11 or RH5 trial samples were uploaded separately into  
662 Cytobank. Live, single (B cell-enriched) lymphocytes were gated and then analysed with  
663 CITRUS using equal event sampling. All fluorophore channels were used for clustering with  
664 the exception of the probes and the viability stain. All groups and time points were run in a  
665 single CITRUS analysis per trial. Median expression values for each fluorophore for each  
666 CITRUS-defined cluster were exported per sample. Average expression values across all  
667 samples for each fluorophore were then calculated per cluster to define FlowJo gating  
668 strategies. Clusters with shared gating strategies were combined into new populations  
669 (**Table 2**) for re-analysis in FlowJo. Ki67 was included in the CITRUS clustering but median  
670 expression values did not facilitate defining a dichotomous gating strategy and thus Ki67  
671 was not utilised in the population definitions. Samples were excluded from analysis if <50  
672 cells in the parent population.



## 673 Acknowledgements

674 We thank the vaccinees and clinical staff for participating in and running the clinical trials  
675 essential for this study, especially Fay Nugent, Jee-Sun Cho, Yrene Themistocleous,  
676 Thomas Rawlinson, Alison Lawrie, Ian Poulton, Rachel Roberts, Iona Taylor, Sumi Biswas,  
677 Julie Furze, Baktash Khozoe, Nicola Greenwood, Saumu Ahmed, Florence Milando, and  
678 Neema Balige. We also thank Jenny Reimer and Cecilia Carnot at Novavax for providing the  
679 Matrix-M™ adjuvant, Federica Cappuccini for guidance developing the T cell flow cytometry  
680 assay, Robert Hedley and Vasiliki Tsioligka from the Sir William Dunn School of Pathology  
681 Flow Cytometry Facility for assistance with sample acquisition and training, and the qPCR  
682 team on the NCT04009096 and NCT04201431 trials (Duncan Bellamy, Hannah Davies,  
683 Francesca Donnellan, Amy Flaxman, Reshma Kailath, Rebecca Makinson, Indra  
684 Rudiansyah, and Marta Ulaszewska). CMN was supported by a Sir Henry Wellcome  
685 Postdoctoral Fellowship (209200/Z/17/Z). SJD was supported by a Wellcome Trust Senior  
686 Fellowship (106917/Z/15/Z) and is a Jenner Investigator. The NCT04009096 trial was  
687 funded by the European Union’s Horizon 2020 research and innovation program under grant  
688 agreement 733073 for MultiViVax. The NCT04201431 trial was funded by the Wellcome  
689 Trust Malaria Infection Study in Thailand (MIST) program [212336/Z/18/Z]. The DBPRII  
690 clinical trial was also supported in part by the UK Medical Research Council (MRC)  
691 [G1100086] and the NIH Research (NIHR) Oxford Biomedical Research Center (BRC). The  
692 views expressed are those of the author(s) and not necessarily those of the NHS, the NIHR  
693 or the Department of Health. Development of PvDBPII as a vaccine candidate was  
694 supported by grants from the Biotechnology Industry Research Assistance Council (BIRAC),  
695 New Delhi and PATH Malaria Vaccine Initiative. MVDP was supported by grants from the Bill  
696 and Melinda Gates Foundation and Department of Biotechnology (DBT), Government of  
697 India. This work was also supported in part by grants from Agence Nationale de Recherche  
698 to CEC (ANR-18-CE15-0026 and ANR 21 CE15-0013-01). CEC is supported by the French  
699 Government’s Laboratoire d’Excellence “PARAFRAP” (ANR-11-LABX-0024-PARAFRAP).

700 The NCT04318002 trial was funded by the EDCTP2 programme supported by the European  
701 Union (grant number RIA2016V-1649-MMVC). The views and opinions of authors expressed  
702 herein do not necessarily state or reflect those of EDCTP. In both NCT04201431 and  
703 NCT04318002 trials the Matrix-M™ adjuvant was provided by Novavax.

704

## 705 [Author contributions](#)

706 CMN led the study. AIO, AMM and SJD were chief, principal or lead investigators on the  
707 clinical trials. JRB, SES, CGM, KMM, MMH, AML, WFK, IMM, KM, MB, HD, LK, NE, SR,  
708 CMN performed experiments and/or oversaw critical sample processing. JRB, SES, NE and  
709 CMN analysed and/or reviewed data. VSC, PM and CEC contributed the PvDBPII vaccine.  
710 JRB and CMN wrote the manuscript.

711

## 712 [Declaration of interests](#)

713 SJD is a named inventor on patent applications relating to RH5 malaria vaccines and  
714 adenovirus-based vaccines, and is an inventor on intellectual property licensed by Oxford  
715 University Innovation to AstraZeneca. AMM has an immediate family member who is an  
716 inventor on patent applications relating to RH5 malaria vaccines and adenovirus-based  
717 vaccines, and is an inventor on intellectual property licensed by Oxford University Innovation  
718 to AstraZeneca. CEC is an inventor on patents that relate to binding domains of erythrocyte-  
719 binding proteins of *Plasmodium* parasites including *P. vivax* DBP.

720 Supplemental Figures

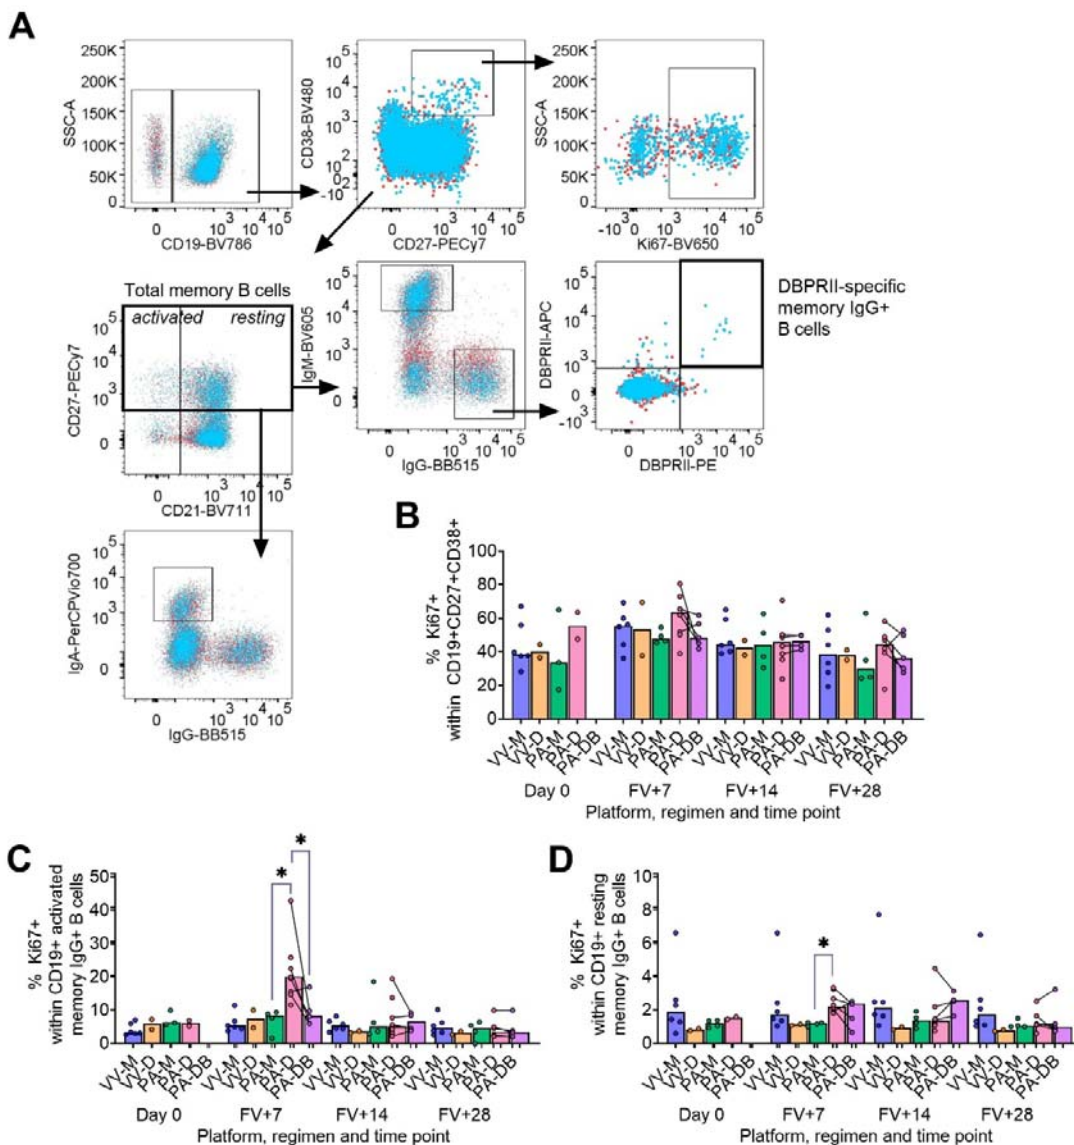

722  
 723 Supplemental Figure 1. DBPRII B cell gating strategy and expression of proliferation marker Ki67.  
 724 PBMC from pre-vaccination (Day 0) and post-final vaccination (FV) time points were analysed for B cell  
 725 responses by flow cytometry. (A) Gating strategy shows identification of CD19+ B cells within live single (B cell-  
 726 enriched) lymphocytes, and definition of CD38+CD27+ plasma cells within this population. Total memory cells  
 727 are defined as CD27+ non-plasma cells (following use of a NOT gate to exclude plasma cells; indicated with thick  
 728 black box); activated and resting memory B cells are more specifically categorised as CD21-CD27+ or  
 729 CD21+CD27+, respectively. IgG+, IgM+ or IgA+ populations are subsequently gated within total memory cells.  
 730 Proliferating (Ki67+) or vaccine-specific (those co-staining with DBPRII-PE and DBPRII-APC probes as indicated  
 731 by thick black box) cells are defined within the plasma cell or isotype-specific memory B cell populations.  
 732 Example shows Ki67 expression of plasma cells and DBPRII-specific gating on memory IgG+ B cells. A FV+14  
 733 sample (blue) is overlaid on a matched Day 0 sample (red) for all plots. Frequencies of Ki67+ cells shown within  
 734 plasma cells (B), activated IgG+ memory B cells (C), and resting IgG+ memory B cells (D). VV-M = ChAd63-MVA  
 735 viral vector monthly dosing; VV-D ChAd63-MVA delayed booster dosing; PA-M = protein/adjuvant monthly  
 736 dosing; PA-D = protein/adjuvant delayed booster dosing; PA-DB = protein/adjuvant delayed booster dosing with  
 737 extra booster. Post-vaccination comparisons were performed between protein/adjuvant dosing regimens by  
 738 Kruskal Wallis test with Dunn's correction for multiple comparisons. Sample sizes for all assays were based on  
 739 sample availability; each circle represents a single sample. VV-M/VV-D/PA-M/PA-D/PA-DB: Day 0 = 6/2/3-4/2/na,  
 740 FV+7 = 6/2/4/8/5, FV+14 = 6/2/4/8/4, FV+28 = 6/2/4/6/5. PA-D vaccinees returning in the PA-DB group are  
 741 connected by lines. Bars represent medians. \*  $p < 0.05$ .

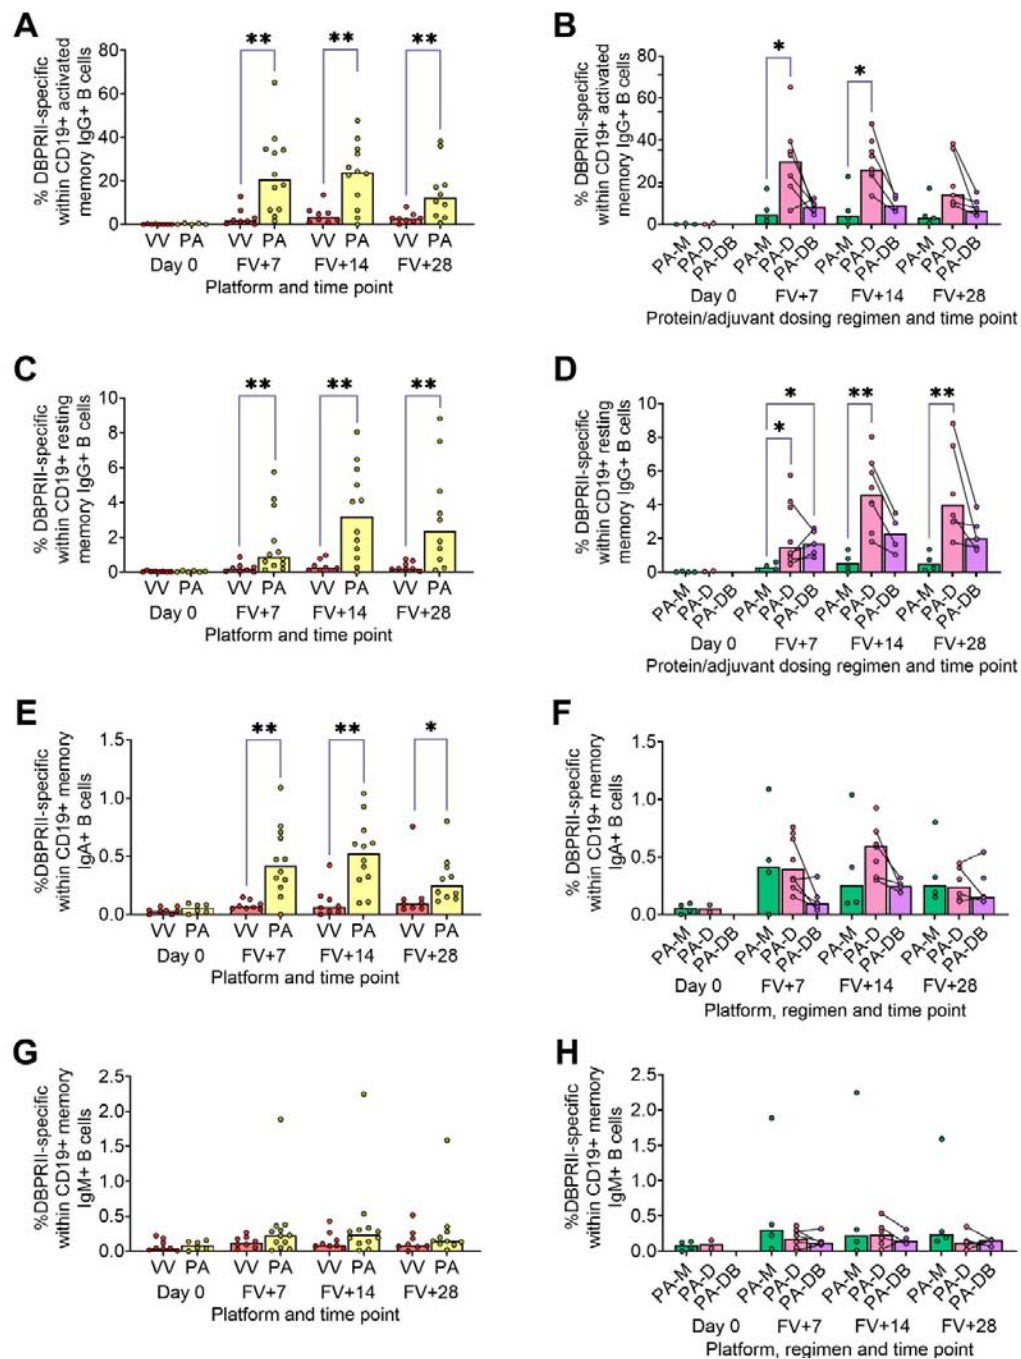

742  
743  
744  
745  
746  
747  
748  
749  
750  
751  
752  
753  
754  
755  
756  
757  
758

Supplemental Figure 2. Extended DBPRII-specific memory B cell responses.

PBMC from pre-vaccination (Day 0) and post-final vaccination (FV) time points were analysed for B cell responses by flow cytometry; gating strategies are as described in Methods and **Supplemental Figure 1**. Frequencies of DBPRII-specific B cells – identified by probe staining – were compared within activated memory IgG+ B cells (**A-B**), resting memory IgG+ B cells (**C-D**), total memory IgA+ B cells (**E-F**), and total memory IgM+ B cells (**G-H**) between vaccine platforms (**A, C, E, G**) or protein/adjuvant dosing regimens (**B, D, F, H**). VV = ChAd63-MVA viral vectors; PA = PvDBPII protein/adjuvant [PA-M and PA-D]; PA-M = PvDBPII protein/adjuvant monthly dosing; PA-D = PvDBPII protein/adjuvant delayed booster dosing; PA-DB = PvDBPII protein/adjuvant delayed booster dosing with extra booster. Post-vaccination comparisons were performed between DBPRII platforms (**A, C, E, G**) with Mann-Whitney U tests, or between PvDBPII protein/adjuvant dosing regimens by Kruskal Wallis test with Dunn's correction for multiple comparisons (**B, D, F, H**). Sample sizes for all assays were based on sample availability; each circle represents a single sample. (**A, C, E, G**) VV/PA: Day 0 = 8/5-6, FV+7 = 8/12, FV+14 = 8/12, FV+28 = 8/10. (**B, D, F, H**) PA-M/PA-D/PA-DB: Day 0 = 3-4/2/na, FV+7 = 4/8/5, FV+14 = 4/8/4, FV+28 = 4/6/5. (**E-F**) M/D: Day 0 = 5/1-4, FV+7 = 4-5/3-4, FV+14 = 4/6, FV+28 = 4/4. PA-D vaccinees returning in the PA-DB group are connected by lines. Bars represent medians. \*  $p < 0.05$ , \*\*  $p < 0.01$ .



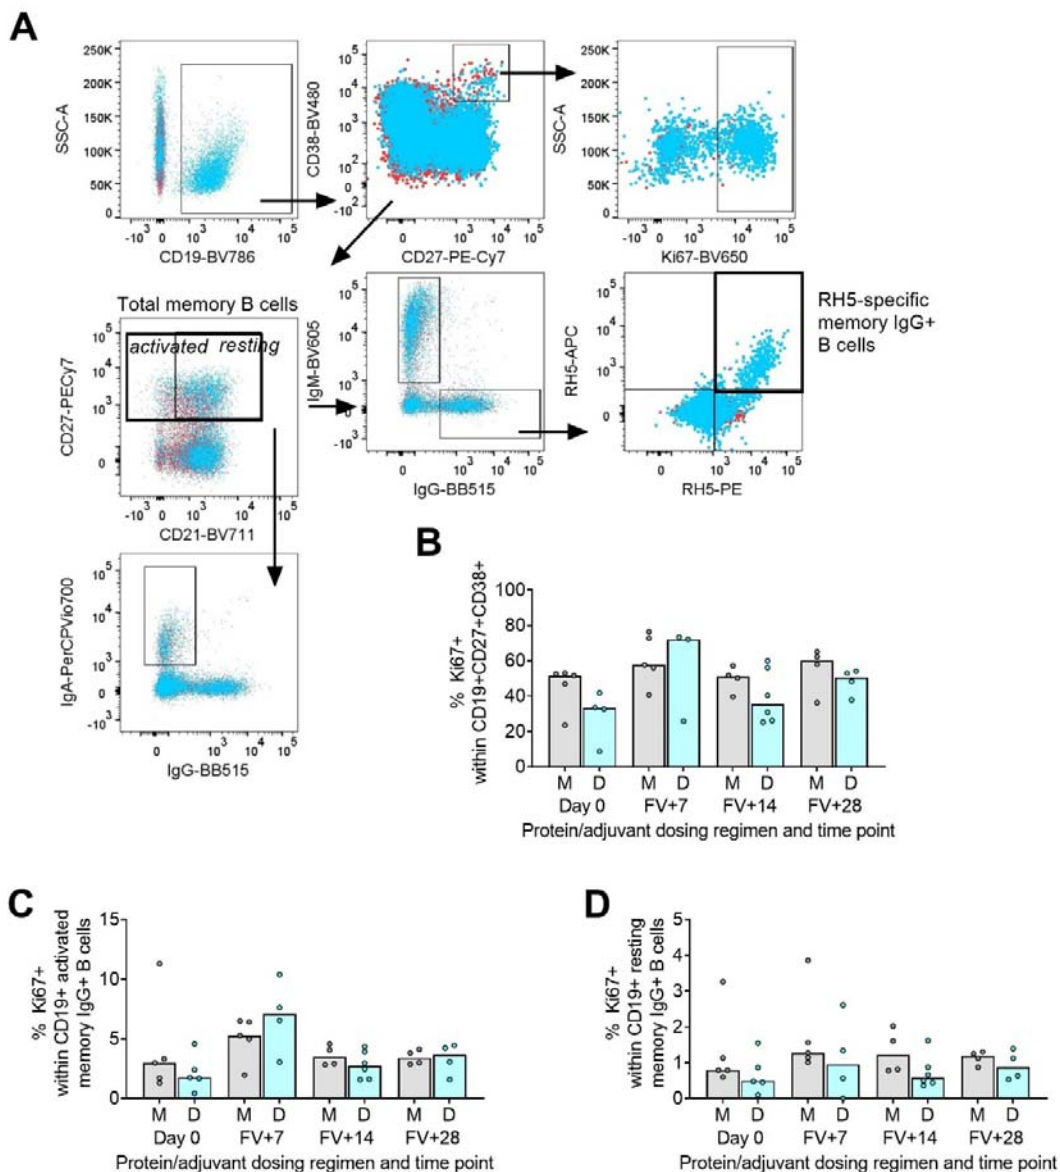

759  
760  
761  
762  
763  
764  
765  
766  
767  
768  
769  
770  
771  
772  
773  
774  
775

Supplemental Figure 3. RH5 B cell gating strategy and expression of proliferation marker Ki67. PBMC from pre-vaccination (Day 0) and post-final vaccination (FV) time points were analysed for B cell responses by flow cytometry. (A) Gating strategy shows identification of CD19+ B cells within live single (B cell-enriched) lymphocytes, and definition of CD38+CD27+ plasma cells within this population. Total memory cells are defined as CD27+ non-plasma cells (using a NOT gate to exclude plasma cells; indicated with thick black box); activated and resting memory B cells are more specifically categorised as CD21-CD27+ or CD21+CD27+, respectively. IgG+, IgM+ or IgA+ populations are subsequently gated within total memory cells. Proliferating (Ki67+) or vaccine-specific (those co-staining with RH5-PE and RH5-APC probes as indicated by thick black box) cells are defined within the plasma cell or isotype-specific memory B cell populations. Example shows Ki67 expression of plasma cells and RH5-specific gating on memory IgG+ B cells. A FV+14 sample (blue) is overlaid on a matched Day 0 sample (red) for all plots. Frequencies of Ki67+ cells shown within plasma cells (B), activated IgG+ memory B cells (C), and resting IgG+ memory B cells (D). M = RH5.1/adjutant monthly dosing; D = RH5.1/adjutant delayed booster dosing. Post-vaccination comparisons were performed between dosing regimens with Mann-Whitney U tests. Sample sizes for all assays were based on sample availability; each circle represents a single sample. (B-D) VV/PA: Day 0 = 5/4-5, FV+7 = 5/3-4, FV+14 = 4/6, FV+28 = 4/4. Bars represent medians.

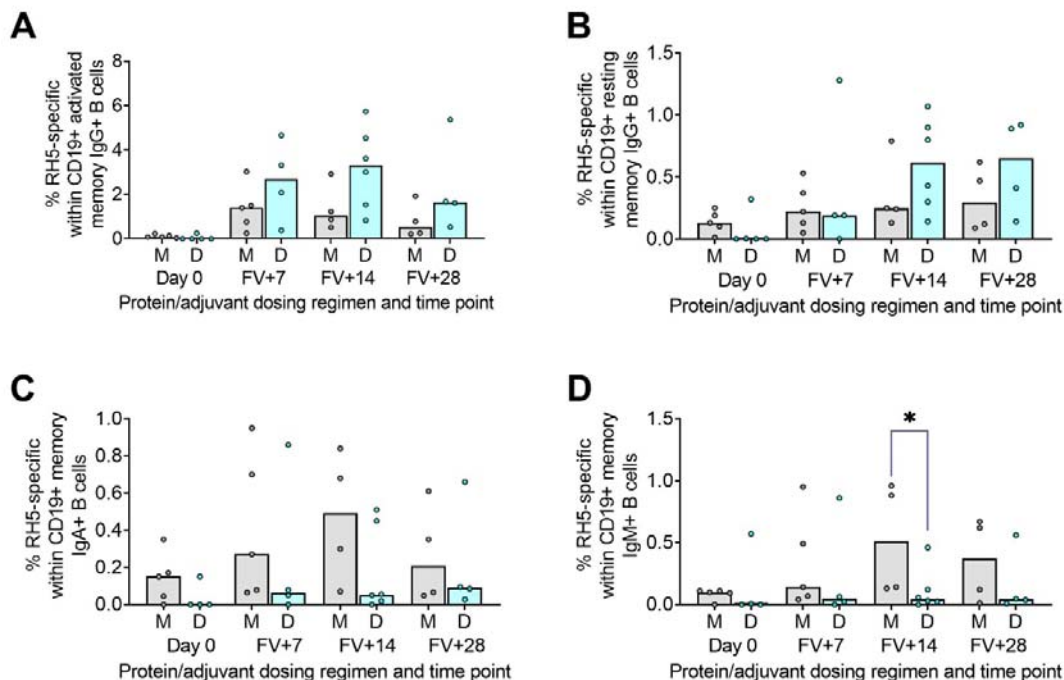

776

777

Supplemental Figure 4. Extended RH5-specific memory B cell responses.

778

PBMC from pre-vaccination (Day 0) and post-final vaccination (FV) time points were analysed for B cell

779

responses by flow cytometry; gating strategies are as described in Methods and **Supplemental Figure 3**.

780

Frequencies of RH5-specific B cells – identified by probe staining – were compared within activated memory

781

IgG+ B cells (**A**), resting memory IgG+ B cells (**B**), total memory IgA+ B cells (**C**), and total memory IgM+ B cells

782

(**D**) between dosing regimens. M = RH5.1/adjutant monthly dosing; D = RH5.1/adjutant delayed booster dosing.

783

Post-vaccination comparisons were performed between dosing regimens with Mann-Whitney U tests. Sample

784

sizes for all assays were based on sample availability; each circle represents a single sample. (**B-D**) VV/PA: Day

785

0 = 5/4-5, FV+7 = 5/4 FV+14 = 4/6, FV+28 = 4/4. Bars represent medians. \*  $p < 0.05$ .

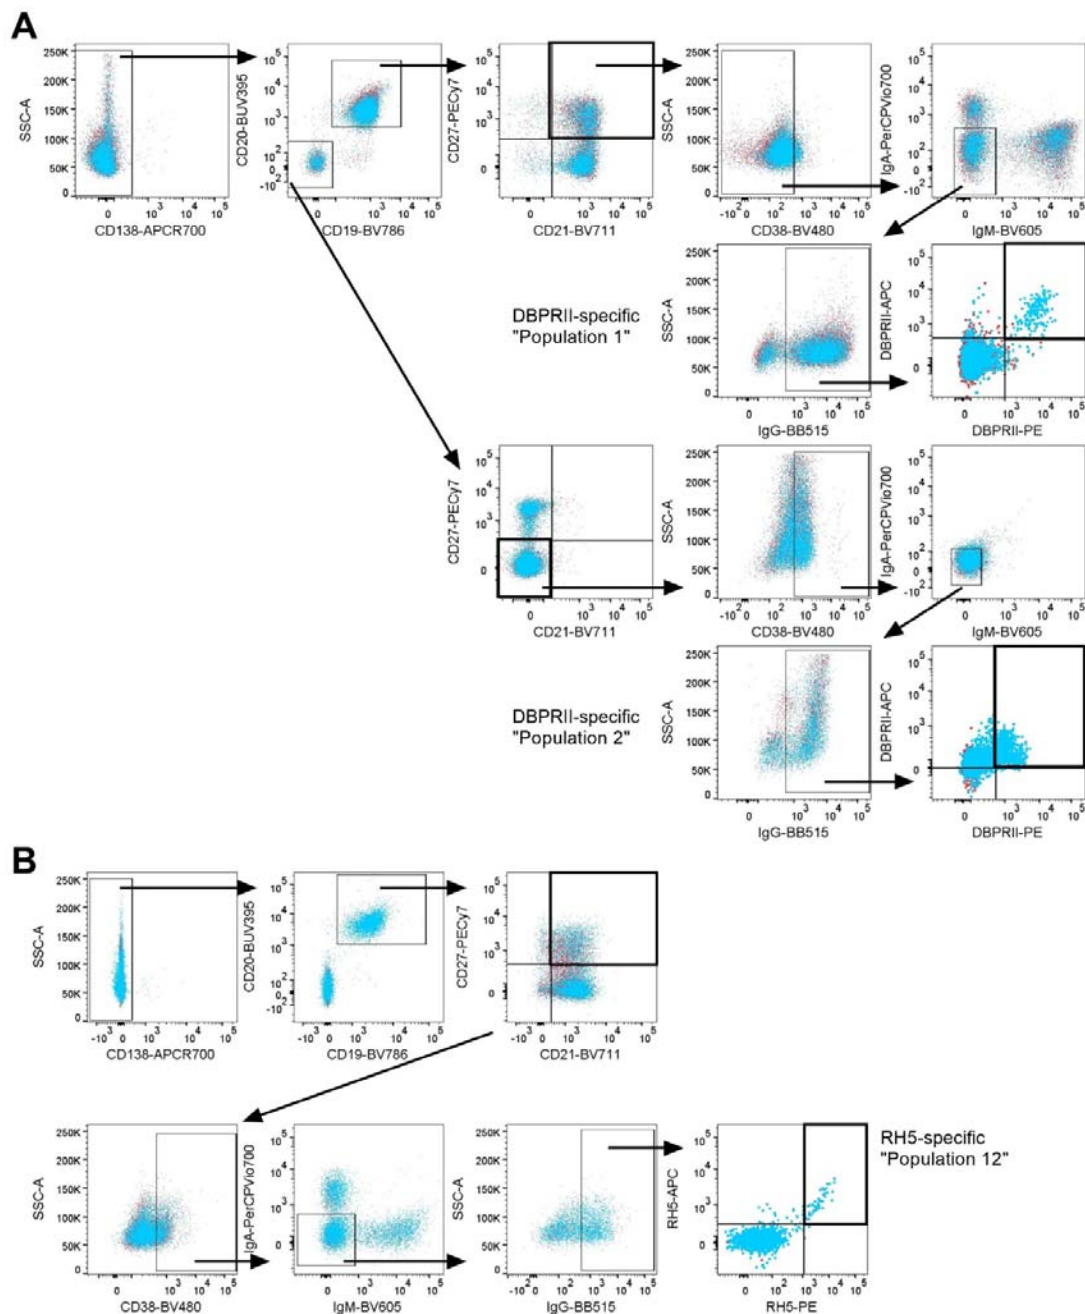

786  
787  
788  
789  
790  
791  
792  
793  
794  
795  
796

Supplemental Figure 5. Gating strategies for key agnostically-defined B cell populations via CITRUS. CITRUS was run on single live (B cell-enriched) lymphocyte flow cytometry fcs files to agnostically define the main B cell populations within either DBPR11 or RH5 trial samples. Median marker expression within each cluster was used to define gating strategies for B cell populations in FlowJo, which were re-analysed for DBPR11- or RH5-specific responses through probe staining. (A) Gating strategy shows identification of "Population 1" (CD19+CD20+CD21+CD27+CD138-CD38-IgM-IgA-IgG+) and "Population 2" (CD19-CD20-CD21-CD27-CD138-CD38-IgM-IgA-IgG+) within the DBPR11 trial and DBPR11-specific cells within these populations. (B) Gating strategy shows identification of "Population 12" (CD19+CD20+CD21+CD27+CD138-CD38-IgM-IgA-IgG+) within the RH5 trial. A FV+14 sample (blue) is overlaid on a matched Day 0 sample (red) for all plots. See **Table 2** for a full list of populations defined via CITRUS.

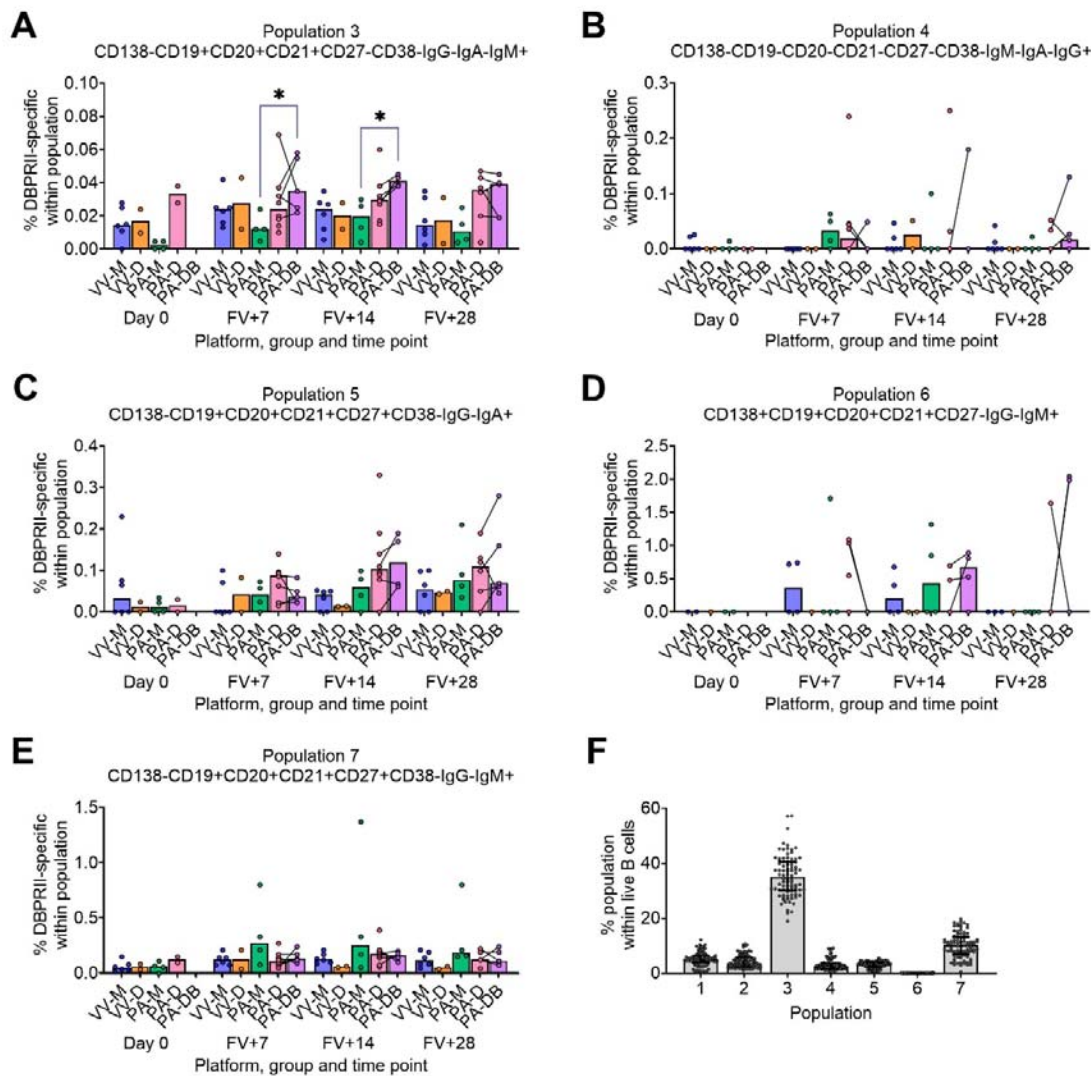

797  
798  
799  
800  
801  
802  
803  
804  
805  
806  
807  
808  
809  
810  
811  
812

Supplemental Figure 6. DBPRII-specific responses within agnostically-defined B cell populations.

CITRUS was run on single live (B cell-enriched) lymphocyte flow cytometry fcs files to agnostically define the main B cell populations within DBPRII trial samples. Median marker expression within each cluster was used to define gating strategies for B cell populations in FlowJo, which were re-analysed for DBPRII-specific responses through probe staining (A-E). Population definitions are annotated on individual figures. (F) Frequencies of each population within single live B cells (enriched from lymphocytes; see also Table 2) of all samples. VV-M = ChAd63-MVA viral vector monthly dosing; VV-D ChAd63-MVA delayed booster dosing; PA-M = PvDBPII protein/adjuvant monthly dosing; PA-D = PvDBPII protein/adjuvant delayed booster dosing; PA-DB = PvDBPII protein/adjuvant delayed booster dosing with extra booster. FV = final vaccination. Post-vaccination comparisons were performed between PvDBPII protein/adjuvant dosing regimens by Kruskal Wallis test with Dunn's correction for multiple comparisons (A-E). Sample sizes for all assays were based on sample availability; each circle represents a single sample. (A-C, E) VV-M/VV-D/PA-M/PA-D/PA-DB: Day 0 = 6/2/4/2/na, FV+7 = 6/2/4/8/5, FV+14 = 6/2/4/8/4, FV+28 = 6/2/4/6/5. PA-D vaccinees returning in the PA-DB group are connected by lines. (D) VV-M/VV-D/PA-M/PA-D/PA-DB: Day 0 = 2/1/2/0/na, FV+7 = 4/1/4/8/4, FV+14 = 4/2/4/8/4, FV+28 = 3/1/4/5/5. (F)  $n = 86$  for all populations. Bars represent medians. \*  $p < 0.05$ .



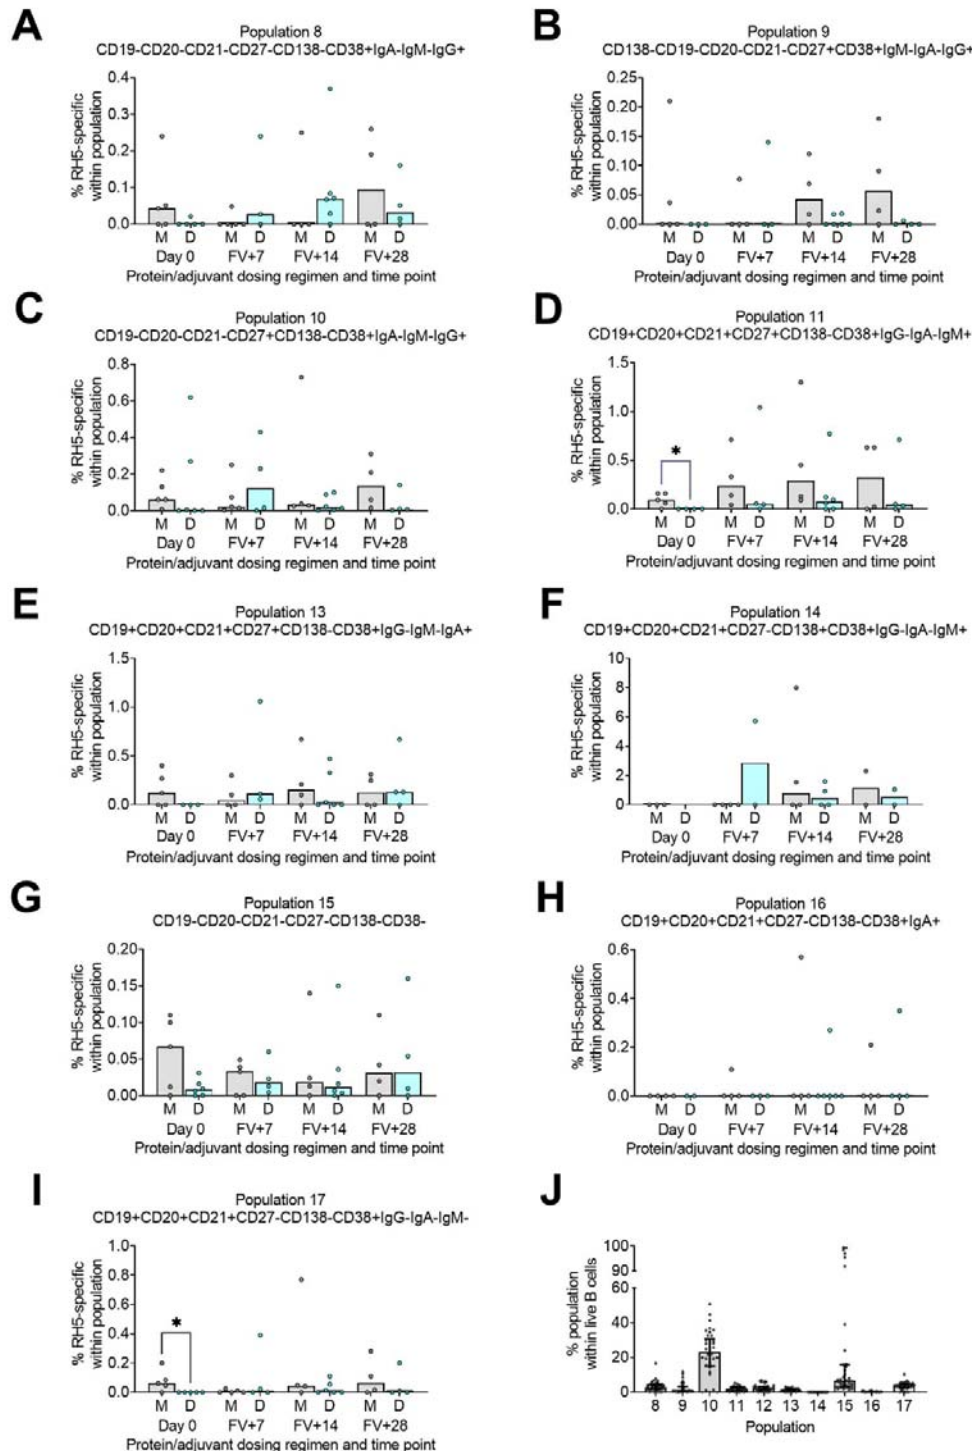

Supplemental Figure 7. RH5-specific responses within agnostically-defined B cell populations.

CITRUS was run on single live (B cell-enriched) lymphocyte flow cytometry fcs files to agnostically define the main B cell populations within RH5 trial samples. Median marker expression within each cluster was used to define gating strategies for B cell populations in FlowJo, which were re-analysed for RH5-specific responses through probe staining (A-I). Population definitions are annotated on individual figures. (J) Frequencies of each population within single live B cells (enriched from lymphocytes; see also **Table 2**) of all samples. M = RH5.1/adjuvant monthly dosing; D = RH5.1/adjuvant delayed booster dosing. FV = final vaccination. Post-vaccination comparisons were performed between dosing regimens with Mann-Whitney U tests (A-I). Sample sizes for all assays were based on sample availability; each circle represents a single sample. (A-G, I) M/D Day 0 = 4-5/2-6, FV+7 = 4-5/3-4, FV+14 = 4/6, FV+28 = 4/4. (H) M/D Day 0 = 3/0, FV+7 = 4/2, FV+14 = 4/4, FV+28 = 2/2. (J)  $n = 38$  for all populations. Bars represent medians. \*  $p < 0.05$ .

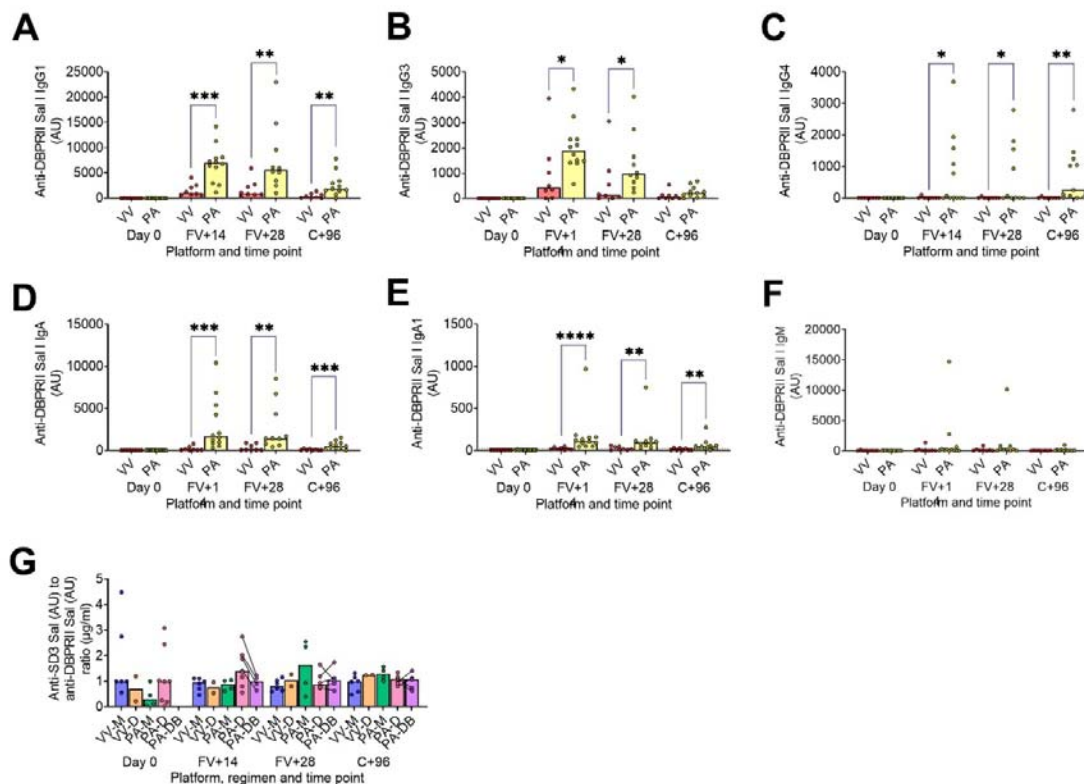

826  
827  
828  
829  
830  
831  
832  
833  
834  
835  
836  
837  
838  
839  
840  
841  
842

Supplemental Figure 8. DBPRII-specific peak antibody responses and serum maintenance.

Standardised ELISAs were developed to report anti-DBPRII specific or anti-subdomain 3 (sd3) antibody responses in pre-vaccination (Day 0) and post-final vaccination (FV) serum samples. Responses were compared between vaccine platforms for IgG1 (A), IgG3 (B), IgG4 (C), IgA (D), IgA1 (E), and IgM (F). IgG2 and IgA2 responses were below the limit of detection (not shown). The ratio of anti-sd3 to anti-DBPRII was also calculated for total IgG (G). VV = ChAd63-MVA viral vectors; PA = PvDBP11 protein/adjuvant [PA-M and PA-D]; VV-M = ChAd63-MVA viral vector monthly dosing; VV-D ChAd63-MVA delayed booster dosing; PA-M = protein/adjuvant monthly dosing; PA-D = protein/adjuvant delayed booster dosing; PA-DB = protein/adjuvant delayed booster dosing with extra booster. C+96 = 96 days after controlled human malaria infection (approximately 16-weeks after FV). Post-vaccination comparisons were performed between platforms (A-F) with Mann-Whitney U tests, or between protein/adjuvant dosing regimens by Kruskal Wallis test with Dunn's correction for multiple comparisons (G). Sample sizes for all assays were based on sample availability; each circle represents a single sample. (A-F) VV/PA: Day 0 = 8/12, FV+14 = 8/12, FV+28 = 8/10. (G) VV-M/VV-D/PA-M/PA-D/PA-DB: Day 0 = 6/2/4/8/na, FV+14 = 6/2/4/8/4, FV+28 = 6/2/4/6/5, C+96 = 6/2/4/7/5. PA-D vaccinees returning in the PA-DB group are connected by lines. Bars represent medians. \*  $p < 0.05$ , \*\*  $p < 0.01$ , \*\*\*  $p < 0.001$ , \*\*\*\*  $p < 0.0001$ .

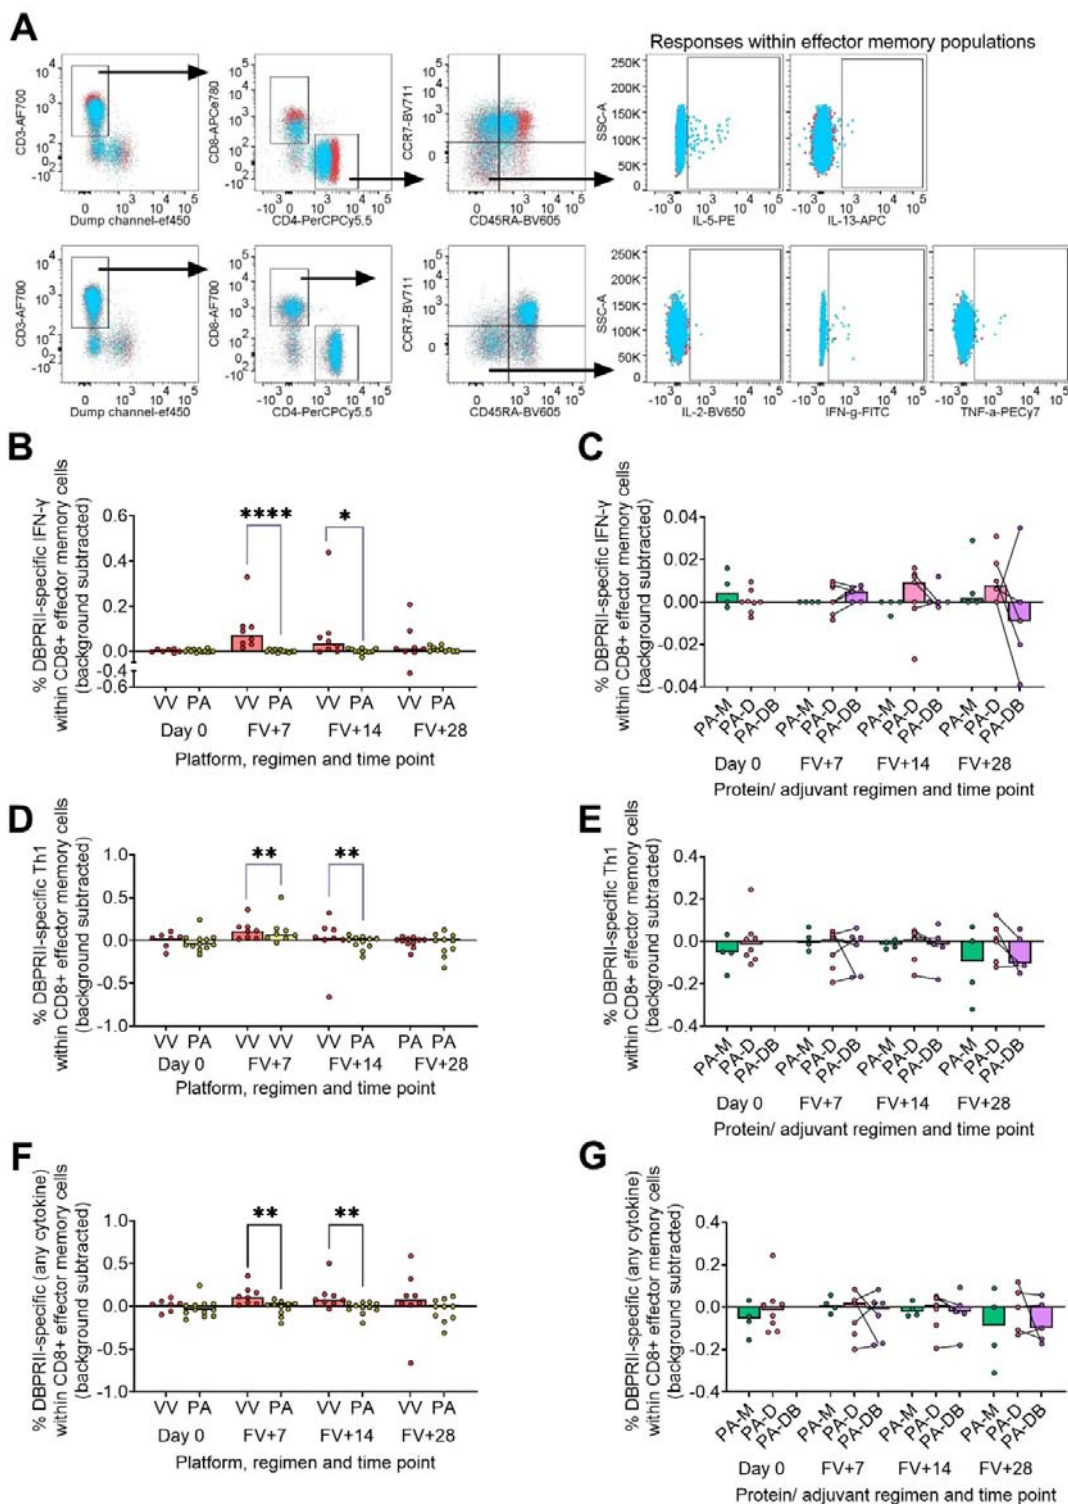

843  
844

845 Supplemental Figure 9. DBPRII-specific T cell gating strategy and CD8+ effector memory responses.  
846 PBMC from pre-vaccination (Day 0) and post-final vaccination (FV) time points were analysed for T cell  
847 responses by intracellular cytokine staining. (A) Gating strategy shows identification of live T cells within single  
848 lymphocytes [dump channel includes viability stain, anti-CD14, and anti-CD19; see Methods], and definition of  
849 CD4+ and CD8+ T cells within this population. Effector memory CD4+ or CD8+ T cells are identified as CD45RA-  
850 CCR7-. Finally, DBPRII-specific T cell responses are defined through detection of intracellular Th2 cytokines (top

851 row; IL-5, IL-13;) or Th1 cytokines (bottom row; IL-2, IFN- $\gamma$ , TNF- $\alpha$ ) following DBPRII peptide pool stimulation. A  
852 FV+7 sample (blue) is overlaid on a matched Day 0 sample (red) for all plots (CD4+ effector memory from  
853 protein/adjuvant vaccinee used as top row Th2 example; CD8+ effector memory from viral vector vaccinee used  
854 as bottom row Th1 example).  
855 DBPRII-specific effector memory CD4+ or CD8+ T cells are reported as frequencies producing cytokines in  
856 response to peptide stimulation after background subtraction of cytokine-positive cells in matched samples  
857 cultured with media alone. Using an 'OR' gate, responses were reported for all cytokines (cells producing any of  
858 IL-5, IL-13, IL-2, IFN- $\gamma$ , or TNF- $\alpha$ ), Th1 cytokines (IL-2, IFN- $\gamma$  or TNF- $\alpha$  only), or Th2 cytokine (IL-5 or IL-13 only;  
859 see **Figure 4**). CD8+ effector memory T cells IFN- $\gamma$  (**B-C**), Th1 (**D-E**) or any cytokine (**F-G**) responses were  
860 compared between vaccine platforms (**B, D, F**) or protein/adjuvant dosing regimens (**C, E, G**). VV = ChAd63-  
861 MVA viral vectors; PA = PvDBPII protein/adjuvant [PA-M and PA-D]; PA-M = PvDBPII protein/adjuvant monthly  
862 dosing; PA-D = PvDBPII protein/adjuvant delayed booster dosing; PA-DB = PvDBPII protein/adjuvant delayed  
863 booster dosing with extra booster. Post-vaccination comparisons were performed between DBPRII platforms by  
864 Mann Whitney U test (**B, D, F**), or protein/adjuvant dosing regimens by Kruskal Wallis test with Dunn's correction  
865 for multiple comparisons (**C, E, G**). Sample sizes for all assays were based on sample availability; each circle  
866 represents a single sample. (**B, D, F**) VV/PA: Day 0 = 7/12, FV+7 = 8/11, FV+14 = 8/11, FV+28 = 8/10. (**C, E, G**)  
867 PA-M/PA-D/PA-DB: Day 0 = 4/8/na, FV+7 = 4/7/6, FV+14 = 4/7/5, FV+28 = 4/6/5. PA-D vaccinees returning in  
868 the PA-DB group are connected by lines. Bars represent medians. \*  $p < 0.05$ , \*\*  $p < 0.01$ , \*\*\*\*  $p < 0.0001$ .



## 869 References

- 870 [1] A. Flaxman, N.G. Marchevsky, D. Jenkin, J. Aboagye, P.K. Aley, B. Angus, S. Belij-  
871 Rammerstorfer, S. Bibi, M. Bittaye, F. Cappuccini, P. Cicconi, E.A. Clutterbuck, S.  
872 Davies, W. Dejnirattisai, C. Dold, K.J. Ewer, P.M. Folegatti, J. Fowler, A.V.S. Hill, S.  
873 Kerridge, A.M. Minassian, J. Mongkolsapaya, Y.F. Mujadidi, E. Plested, M.N.  
874 Ramasamy, H. Robinson, H. Sanders, E. Sheehan, H. Smith, M.D. Snape, R. Song,  
875 D. Woods, G. Sreaton, S.C. Gilbert, M. Voysey, A.J. Pollard, T. Lambe, and  
876 C.V.T.g. Oxford, Reactogenicity and immunogenicity after a late second dose or a  
877 third dose of ChAdOx1 nCoV-19 in the UK: a substudy of two randomised controlled  
878 trials (COV001 and COV002). *Lancet* 398 (2021) 981-990.
- 879 [2] M. Voysey, S.A. Costa Clemens, S.A. Madhi, L.Y. Weckx, P.M. Folegatti, P.K. Aley, B.  
880 Angus, V.L. Baillie, S.L. Barnabas, Q.E. Bhorat, S. Bibi, C. Briner, P. Cicconi, E.A.  
881 Clutterbuck, A.M. Collins, C.L. Cutland, T.C. Darton, K. Dheda, C. Dold, C.J.A.  
882 Duncan, K.R.W. Emary, K.J. Ewer, A. Flaxman, L. Fairlie, S.N. Faust, S. Feng, D.M.  
883 Ferreira, A. Finn, E. Galiza, A.L. Goodman, C.M. Green, C.A. Green, M. Greenland,  
884 C. Hill, H.C. Hill, I. Hirsch, A. Izu, D. Jenkin, C.C.D. Joe, S. Kerridge, A. Koen, G.  
885 Kwatra, R. Lazarus, V. Libri, P.J. Lillie, N.G. Marchevsky, R.P. Marshall, A.V.A.  
886 Mendes, E.P. Milan, A.M. Minassian, A. McGregor, Y.F. Mujadidi, A. Nana, S.D.  
887 Padayachee, D.J. Phillips, A. Pittella, E. Plested, K.M. Pollock, M.N. Ramasamy, A.J.  
888 Ritchie, H. Robinson, A.V. Schwarzbold, A. Smith, R. Song, M.D. Snape, E. Sprinz,  
889 R.K. Sutherland, E.C. Thomson, M.E. Torok, M. Toshner, D.P.J. Turner, J.  
890 Vekemans, T.L. Villafana, T. White, C.J. Williams, A.D. Douglas, A.V.S. Hill, T.  
891 Lambe, S.C. Gilbert, A.J. Pollard, and C.V.T.G. Oxford, Single-dose administration  
892 and the influence of the timing of the booster dose on immunogenicity and efficacy of  
893 ChAdOx1 nCoV-19 (AZD1222) vaccine: a pooled analysis of four randomised trials.  
894 *Lancet* 397 (2021) 881-891.
- 895 [3] R.P. Payne, S. Longet, J.A. Austin, D.T. Skelly, W. Dejnirattisai, S. Adele, N. Meardon, S.  
896 Faustini, S. Al-Taei, S.C. Moore, T. Tipton, L.M. Hering, A. Angyal, R. Brown, A.R.  
897 Nicols, N. Gillson, S.L. Dobson, A. Amini, P. Supasa, A. Cross, A. Bridges-Webb,  
898 L.S. Reyes, A. Linder, G. Sandhar, J.A. Kilby, J.K. Tyerman, T. Altmann, H. Hornsby,  
899 R. Whitham, E. Phillips, T. Malone, A. Hargreaves, A. Shields, A. Saei, S. Foulkes, L.  
900 Stafford, S. Johnson, D.G. Wootton, C.P. Conlon, K. Jeffery, P.C. Matthews, J.  
901 Frater, A.S. Deeks, A.J. Pollard, A. Brown, S.L. Rowland-Jones, J. Mongkolsapaya,  
902 E. Barnes, S. Hopkins, V. Hall, C. Dold, C.J.A. Duncan, A. Richter, M. Carroll, G.  
903 Sreaton, T.I. de Silva, L. Turtle, P. Klenerman, S. Dunachie, and P. Consortium,  
904 Immunogenicity of standard and extended dosing intervals of BNT162b2 mRNA  
905 vaccine. *Cell* (2021).
- 906 [4] A.M. Minassian, S.E. Silk, J.R. Barrett, C.M. Nielsen, K. Miura, A. Diouf, C. Loos, J.K.  
907 Fallon, A.R. Michell, M.T. White, N.J. Edwards, I.D. Poulton, C.H. Mitton, R.O.  
908 Payne, M. Marks, H. Maxwell-Scott, A. Querol-Rubiera, K. Bisnauthsing, R. Batra, T.  
909 Ogrina, N.J. Brendish, Y. Themistocleous, T.A. Rawlinson, K.J. Ellis, D. Quinkert, M.  
910 Baker, R. Lopez Ramon, F. Ramos Lopez, L. Barfod, P.M. Folegatti, D. Silman, M.  
911 Dattoo, I.J. Taylor, J. Jin, D. Pulido, A.D. Douglas, W.A. de Jongh, R. Smith, E.  
912 Berrie, A.R. Noe, C.L. Diggs, L.A. Soisson, R. Ashfield, S.N. Faust, A.L. Goodman,  
913 A.M. Lawrie, F.L. Nugent, G. Alter, C.A. Long, and S.J. Draper, Reduced blood-stage  
914 malaria growth and immune correlates in humans following RH5 vaccination. *Med (N*  
915 *Y)* 2 (2021) 701-719 e19.
- 916 [5] C.M. Nielsen, J.R. Barrett, C. Davis, J.K. Fallon, C. Goh, A.R. Michell, C. Griffin, A. Kwok,  
917 C. Loos, S. Darko, F. Laboune, M. Tekman, A. Diouf, K. Miura, J.R. Francica, A.  
918 Ransier, C.A. Long, S.E. Silk, R.O. Payne, A.M. Minassian, D.A. Lauffenburger, R.A.  
919 Seder, D.C. Douek, G. Alter, and S.J. Draper, Delayed boosting improves human  
920 antigen-specific Ig and B cell responses to the RH5.1/AS01B malaria vaccine. *JCI*  
921 *Insight* 8 (2023).

- 922 [6] J.A. Stoute, M. Slaoui, D.G. Heppner, P. Momin, K.E. Kester, P. Desmons, B.T. Wellde,  
923 N. Garcon, U. Krzych, M. Marchand, W.R. Ballou, and J.D. Cohen, A preliminary  
924 evaluation of a recombinant circumsporozoite protein vaccine against *Plasmodium*  
925 *falciparum* malaria. *New England Journal of Medicine* 336 (1997) 86-91.
- 926 [7] J.A. Regules, S.B. Cicatelli, J.W. Bennett, K.M. Paolino, P.S. Twomey, J.E. Moon, A.K.  
927 Kathcart, K.D. Hauns, J.L. Komisar, A.N. Qabar, S.A. Davidson, S. Dutta, M.E.  
928 Griffith, C.D. Magee, M. Wojnarski, J.R. Livezey, A.T. Kress, P.E. Waterman, E.  
929 Jongert, U. Wille-Reece, W. Volkmuth, D. Emerling, W.H. Robinson, M. Lievens, D.  
930 Morelle, C.K. Lee, B. Yassin-Rajkumar, R. Weltzin, J. Cohen, R.M. Paris, N.C.  
931 Waters, A.J. Birkett, D.C. Kaslow, W.R. Ballou, C.F. Ockenhouse, and J. Vekemans,  
932 Fractional Third and Fourth Dose of RTS,S/AS01 Malaria Candidate Vaccine: A  
933 Phase 2a Controlled Human Malaria Parasite Infection and Immunogenicity Study. *J*  
934 *Infect Dis* 214 (2016) 762-71.
- 935 [8] S. Chaudhury, J.A. Regules, C.A. Darko, S. Dutta, A. Wallqvist, N.C. Waters, E. Jongert,  
936 F. Lemiale, and E.S. Bergmann-Leitner, Delayed fractional dose regimen of the  
937 RTS,S/AS01 malaria vaccine candidate enhances an IgG4 response that inhibits  
938 serum opsonophagocytosis. *Sci Rep* 7 (2017) 7998.
- 939 [9] S. Pallikkuth, S. Chaudhury, P. Lu, L. Pan, E. Jongert, U. Wille-Reece, and S. Pahwa, A  
940 delayed fractionated dose RTS,S AS01 vaccine regimen mediates protection via  
941 improved T follicular helper and B cell responses. *Elife* 9 (2020).
- 942 [10] J. Das, J.K. Fallon, T.C. Yu, A. Michell, T.J. Suscovich, C. Linde, H. Natarajan, J.  
943 Weiner, M. Coccia, S. Gregory, M.E. Ackerman, E. Bergmann-Leitner, L. Fontana, S.  
944 Dutta, D.A. Lauffenburger, E. Jongert, U. Wille-Reece, and G. Alter, Delayed  
945 fractional dosing with RTS,S/AS01 improves humoral immunity to malaria via a  
946 balance of polyfunctional NANP6- and Pf16-specific antibodies. *Med (N Y)* 2 (2021)  
947 1269-1286 e9.
- 948 [11] M.M. Hou, J.R. Barrett, Y. Themistocleous, T.A. Rawlinson, A. Diouf, F.J. Martinez,  
949 C.M. Nielsen, A.M. Lias, L.D.W. King, N.J. Edwards, N.M. Greenwood, L. Kingham,  
950 I.D. Poulton, B. Khozoe, C. Goh, D.J. Mac Lochlainn, J. Salkeld, M. Guilotte-  
951 Blisnick, C. Huon, F. Mohring, J.M. Reimer, V.S. Chauhan, P. Mukherjee, S. Biswas,  
952 I.J. Taylor, A.M. Lawrie, J.S. Cho, F.L. Nugent, C.A. Long, R.W. Moon, K. Miura, S.E.  
953 Silk, C.E. Chitnis, A.M. Minassian, and S.J. Draper, Impact of a blood-stage vaccine  
954 on *Plasmodium vivax* malaria. *medRxiv* (2022).
- 955 [12] C.M. Nielsen, A. Ogbe, I. Pedroza-Pacheco, S.E. Doeleman, Y. Chen, S.E. Silk, J.R.  
956 Barrett, S.C. Elias, K. Miura, A. Diouf, M. Bardelli, R.A. Dabbs, L. Barfod, C.A. Long,  
957 B.F. Haynes, R.O. Payne, A.M. Minassian, T. Bradley, S.J. Draper, and P. Borrow,  
958 Protein/AS01B vaccination elicits stronger, more Th2-skewed antigen-specific human  
959 T follicular helper cell responses than heterologous viral vectors. *Cell Rep Med* 2  
960 (2021) 100207.
- 961 [13] K.M. Kwiatkowska, C.G. Mkindi, and C.M. Nielsen, Human lymphoid tissue sampling for  
962 vaccinology. *Front Immunol* 13 (2022) 1045529.
- 963 [14] A. Nicolas, G. Sannier, M. Dube, M. Nayrac, A. Tauzin, M.M. Painter, R.R. Goel, M.  
964 Laporte, G. Gendron-Lepage, H. Medjahed, J.C. Williams, N. Brassard, J. Niessl, L.  
965 Gokool, C. Morrisseau, P. Arlotto, C. Tremblay, V. Martel-Laferrriere, A. Finzi, A.R.  
966 Greenplate, E.J. Wherry, and D.E. Kaufmann, An extended SARS-CoV-2 mRNA  
967 vaccine prime-boost interval enhances B cell immunity with limited impact on T cells.  
968 *iScience* 26 (2023) 105904.
- 969 [15] G. Arumugakani, S.J. Stephenson, D.J. Newton, A. Rawstron, P. Emery, G.M. Doody,  
970 D. McGonagle, and R.M. Tooze, Early Emergence of CD19-Negative Human  
971 Antibody-Secreting Cells at the Plasmablast to Plasma Cell Transition. *J Immunol*  
972 198 (2017) 4618-4628.
- 973 [16] H.E. Mei, I. Wirries, D. Frolich, M. Brisslert, C. Giesecke, J.R. Grun, T. Alexander, S.  
974 Schmidt, K. Luda, A.A. Kuhl, R. Engelmann, M. Durr, T. Scheel, M. Bokarewa, C.  
975 Perka, A. Radbruch, and T. Dorner, A unique population of IgG-expressing plasma  
976 cells lacking CD19 is enriched in human bone marrow. *Blood* 125 (2015) 1739-48.

- 977 [17] J.L. Halliley, C.M. Tipton, J. Liesveld, A.F. Rosenberg, J. Darce, I.V. Gregoretti, L.  
978 Popova, D. Kaminiski, C.F. Fucile, I. Albizua, S. Kyu, K.Y. Chiang, K.T. Bradley, R.  
979 Burack, M. Slifka, E. Hammarlund, H. Wu, L. Zhao, E.E. Walsh, A.R. Falsey, T.D.  
980 Randall, W.C. Cheung, I. Sanz, and F.E. Lee, Long-Lived Plasma Cells Are  
981 Contained within the CD19(-)CD38(hi)CD138(+) Subset in Human Bone Marrow.  
982 *Immunity* 43 (2015) 132-45.
- 983 [18] D.C. Nguyen, C.J. Joyner, I. Sanz, and F.E. Lee, Factors Affecting Early Antibody  
984 Secreting Cell Maturation Into Long-Lived Plasma Cells. *Front Immunol* 10 (2019)  
985 2138.
- 986 [19] A. Tomic, I. Tomic, Y. Rosenberg-Hasson, C.L. Dekker, H.T. Maecker, and M.M. Davis,  
987 SIMON, an Automated Machine Learning System, Reveals Immune Signatures of  
988 Influenza Vaccine Responses. *J Immunol* 203 (2019) 749-759.
- 989 [20] C. Nielsen, J. Barrett, C. Davis, J. Fallon, C. Goh, A. Michell, C. Griffin, A. Kwok, C.  
990 Loos, S. Darko, F. Laboune, S. Silk, M. Tekman, J. Francica, A. Ransier, R. Payne,  
991 A. Minassian, D. Lauffenburger, R. Seder, D. Douek, G. Alter, and S. Draper,  
992 Delayed booster dosing improves human antigen-specific Ig and B cell responses to  
993 the RH5.1/AS01<sub>B</sub> malaria vaccine. *medRxiv* (2022) 2022.04.25.22274161.
- 994 [21] K. Miura, A.C. Orcutt, O.V. Muratova, L.H. Miller, A. Saul, and C.A. Long, Development  
995 and characterization of a standardized ELISA including a reference serum on each  
996 plate to detect antibodies induced by experimental malaria vaccines. *Vaccine* 26  
997 (2008) 193-200.
- 998 [22] R.O. Payne, S.E. Silk, S.C. Elias, K. Miura, A. Diouf, F. Galaway, H. de Graaf, N.J.  
999 Brendish, I.D. Poulton, O.J. Griffiths, N.J. Edwards, J. Jin, G.M. Labbe, D.G. Alanine,  
1000 L. Siani, S. Di Marco, R. Roberts, N. Green, E. Berrie, A.S. Ishizuka, C.M. Nielsen,  
1001 M. Bardelli, F.D. Partey, M.F. Ofori, L. Barfod, J. Wambua, L.M. Murungi, F.H. Osier,  
1002 S. Biswas, J.S. McCarthy, A.M. Minassian, R. Ashfield, N.K. Viebig, F.L. Nugent,  
1003 A.D. Douglas, J. Vekemans, G.J. Wright, S.N. Faust, A.V. Hill, C.A. Long, A.M.  
1004 Lawrie, and S.J. Draper, Human vaccination against RH5 induces neutralizing  
1005 antimalarial antibodies that inhibit RH5 invasion complex interactions. *JCI Insight* 2  
1006 (2017).
- 1007 [23] A.D. Douglas, N.J. Edwards, C.J. Duncan, F.M. Thompson, S.H. Sheehy, G.A. O'Hara,  
1008 N. Anagnostou, M. Walther, D.P. Webster, S.J. Dunachie, D.W. Porter, L. Andrews,  
1009 S.C. Gilbert, S.J. Draper, A.V. Hill, and P. Bejon, Comparison of modeling methods  
1010 to determine liver-to-blood inocula and parasite multiplication rates during controlled  
1011 human malaria infection. *J Infect Dis* 208 (2013) 340-5.
- 1012 [24] A.M. Minassian, Y. Themistocleous, S.E. Silk, J.R. Barrett, A. Kemp, D. Quinkert, C.M.  
1013 Nielsen, N.J. Edwards, T.A. Rawlinson, F. Ramos Lopez, W. Roobsoong, K.J. Ellis,  
1014 J.S. Cho, E. Aunin, T.D. Otto, A.J. Reid, F.A. Bach, G.M. Labbe, I.D. Poulton, A.  
1015 Marini, M. Zaric, M. Mulatier, R. Lopez Ramon, M. Baker, C.H. Mitton, J.C. Sousa, N.  
1016 Rachaphaew, C. Kumpitak, N. Maneechai, C. Suansomjit, T. Piteekan, M.M. Hou, B.  
1017 Khozoe, K. McHugh, D.J. Roberts, A.M. Lawrie, A.M. Blagborough, F.L. Nugent, I.J.  
1018 Taylor, K.J. Johnson, P.J. Spence, J. Sattabongkot, S. Biswas, J.C. Rayner, and S.J.  
1019 Draper, Controlled human malaria infection with a clone of *Plasmodium vivax* with  
1020 high-quality genome assembly. *JCI Insight* 6 (2021).  
1021
